# Supplementary material for: MGSEA – a multivariate Gene set enrichment analysis
Source: BMC Bioinformatics. 2019 Mar 18;20:145. doi: 10.1186/s12859-019-2716-6 (PMC6421703; doi:10.1186/s12859-019-2716-6)
Supplement: Supplementary file 5 — Table S2. Parameters settings for analysis presented in this study. The table shows the parameters used for MGSEA and REVIGO in the analysis. (XLSX 8 kb) [file 12859_2019_2716_MOESM5_ESM.xlsx]

## Sheet: TableS2
Program	Parameters	Values
MGSEA	Length of query gene list	5000
	Overlap cutoff for a GO term to be included	50
REVIGO	Database selected	Homo sapiens
	Allowed similarity	Tiny
	Semantic similarity measure	Lin
	P-values provided for REVIGO Input	No
