# Supplementary material for: MGSEA – a multivariate Gene set enrichment analysis
Source: BMC Bioinformatics. 2019 Mar 18;20:145. doi: 10.1186/s12859-019-2716-6 (PMC6421703; doi:10.1186/s12859-019-2716-6)
Supplement: Supplementary file 6 — Table S3. Mann-Whitney p-values of 16 pairwise random walk comparisons among the 434 functional categories in the TCGA breast cancer data. The table shows the Mann-Whitney p-values of 16 pairwise random walk comparisons among the 434 significant gene sets in the TCGA breast cancer data. (XLSX 79 kb) [file 12859_2019_2716_MOESM6_ESM.xlsx]

## Sheet: TableS3
Geneset	C.1.C.0.	C.2.C.0.	C.3.C.0.	C.12.C.0.	C.23.C.0.	C.31.C.0.	C.123.C.0.	C.12.C.1.2.	C.12.C.2.1.	C.23.C.2.3.	C.23.C.3.2.	C.13.C.1.3.	C.13.C.3.1.	C.123.C.1.23.	C.123.C.2.13.	C.123.C.3.12.
GO_ACTIN_FILAMENT_ORGANIZATION	0.196191	2.82e-17	0.00100671	0	0	2.07e-192	0	3.8e-19	2.99e-35	1.28e-29	1.92e-23	0.99682	0.976617	2.68e-128	1.72e-195	5.43e-98
GO_ADAPTIVE_IMMUNE_RESPONSE	5.82e-16	1	1	0	2.16e-109	5.94e-214	0	5.52e-84	1.87e-41	0.183424	0.953691	1.31e-15	0.999994	1.14e-176	1.78e-193	7.63e-61
GO_AGING	1	9.94e-15	2.11e-09	1.95e-216	0	1.03e-214	0	0.974131	5.94e-11	3.68e-22	3.5e-19	0.954415	4.74e-10	1.51e-96	6.7e-152	1.15e-134
GO_ALPHA_AMINO_ACID_METABOLIC_PROCESS	0.105093	0.502648	1.06e-37	1.5e-275	0	0	0	1.03e-22	2.58e-20	2.3e-07	1.29e-29	0.0134705	4.2e-20	5.49e-92	1.74e-107	5.26e-112
GO_AMINOGLYCAN_METABOLIC_PROCESS	1	1.4e-08	5.31e-27	2.5e-235	0	7.26e-230	0	0.00089534	1.44e-18	4e-18	6.85e-37	0.16265	6.21e-23	4.01e-103	6.29e-113	6.82e-159
GO_ANATOMICAL_STRUCTURE_HOMEOSTASIS	0.999981	0.512955	5.41e-29	1.57e-192	0	2.23e-306	0	0.0790586	0.000477229	6.31e-11	8.36e-35	0.0337084	4.73e-28	6.69e-126	4.69e-103	1.06e-152
GO_ANION_TRANSMEMBRANE_TRANSPORT	9.41e-137	1	0.664995	0	1.03e-183	0	0	4.01e-148	1.22e-33	0.0933073	2.4e-10	1.86e-52	0.765804	4.03e-199	1.2e-172	9.38e-63
GO_ANION_TRANSMEMBRANE_TRANSPORTER_ACTIVITY	2.46e-105	1	0.999801	0	2.11e-161	0	0	5.34e-128	4.02e-30	0.256405	4.05e-06	3.87e-36	0.999385	2.62e-155	7.84e-128	1.69e-37
GO_ANION_TRANSPORT	3.23e-33	1	0.026633	0	4.17e-209	0	0	4.5e-52	1.4e-13	0.00915086	8.68e-14	3.31e-25	3.43e-05	1.41e-133	3.74e-122	1.63e-97
GO_ANTERIOR_POSTERIOR_PATTERN_SPECIFICATION	9.34e-14	0.000439511	0.345765	0	4.7e-220	1.09e-297	0	1e-26	7.21e-21	0.0001328	0.0396442	7.6e-35	2.24e-24	7.71e-167	3.6e-78	5.72e-104
GO_APICAL_PLASMA_MEMBRANE	0.00260982	1	1.66e-14	1.94e-226	1.61e-251	1.57e-306	0	2.42e-18	1.1e-05	0.0090336	1.57e-19	2.71e-10	1.13e-16	1.99e-125	7.38e-90	6.57e-110
GO_APOPTOTIC_SIGNALING_PATHWAY	0.999995	9.19e-20	2.27e-07	0	0	1.05e-175	0	8.59e-16	9.52e-45	3.93e-48	1.3e-38	0.997823	0.0460253	1.15e-63	2.78e-164	6.1e-120
GO_BINDING_BRIDGING	0.894149	1.86e-26	0.779362	1.64e-276	1.64e-295	2.29e-163	0	0.0793111	2.72e-16	2.28e-52	2.1e-21	0.989295	0.997905	4.27e-54	2.96e-158	2.08e-114
GO_BONE_DEVELOPMENT	1.01e-58	0.210953	0.529381	0	6.43e-210	5.84e-302	0	1.01e-124	8.98e-68	1.63e-05	0.000463334	3.69e-31	3.88e-05	1.91e-175	1.22e-121	1.3e-39
GO_BRANCHING_MORPHOGENESIS_OF_AN_EPITHELIAL_TUBE	6.91e-10	0.999997	5.12e-26	1.57e-190	1.07e-299	0	0	0.000610278	0.971408	3.18e-14	6.36e-41	1.35e-15	5.49e-29	6.62e-142	6.59e-142	1.85e-200
GO_CALCIUM_ION_TRANSPORT	1.31e-33	1	1	0	1.51e-103	6.72e-252	0	1.4e-68	6.83e-10	0.0799198	0.0755571	1.64e-28	0.397799	3.41e-134	4.53e-116	2.05e-74
GO_CARBOHYDRATE_BIOSYNTHETIC_PROCESS	1	1.08e-08	1.62e-34	8.02e-133	0	1.63e-161	0	1	7.55e-06	8.81e-50	7.25e-64	0.520252	7.52e-28	1.87e-47	3.34e-85	9.74e-168
GO_CARDIAC_CHAMBER_DEVELOPMENT	2.13e-70	1.17e-05	1.13e-07	0	3.16e-269	1.03e-295	0	5.32e-26	0.00013823	1.16e-15	2.23e-16	2.09e-11	0.351265	2.11e-99	3.91e-134	3.22e-93
GO_CATION_CHANNEL_ACTIVITY	9.48e-12	1	1.28e-13	3.87e-179	1.24e-183	0	0	3.9e-20	0.999688	0.999989	3.77e-19	1.26e-18	1.77e-15	3.33e-199	7.84e-151	4.73e-213
GO_CATION_CHANNEL_COMPLEX	1.7e-45	1	6.3e-09	1.89e-280	1.82e-157	0	0	4.38e-72	0.0319193	1	4.14e-11	2.04e-35	2.06e-13	1.19e-273	2.1e-216	1.25e-187
GO_CELL_ACTIVATION	5.36e-14	0.853954	1	0	2.69e-163	9.3e-225	0	2.14e-47	5.18e-27	0.000291856	0.84329	7.6e-12	0.995336	5.54e-204	5.46e-186	6.94e-82
GO_CELL_ADHESION_MOLECULE_BINDING	1.16e-15	0.999994	1	1.37e-271	3.71e-176	3.71e-242	0	4.3e-34	5.28e-12	0.0040033	0.0306242	8.42e-18	0.00152965	1.22e-144	1.58e-88	2.21e-63
GO_CELL_CELL_ADHESION_VIA_PLASMA_MEMBRANE_ADHESION_MOLECULES	2.8e-44	1	0.993979	0	2.13e-98	0	0	1.45e-84	6.68e-16	1	0.969894	8.6e-48	1.33e-10	4.17e-195	2.78e-79	1.09e-65
GO_CELL_CELL_ADHESION	1.94e-18	0.999794	1	0	1.44e-136	1.24e-237	0	4.68e-46	6.23e-19	0.27996	0.997623	1.21e-18	0.854461	4.59e-198	2.49e-165	2.97e-110
GO_CELL_CELL_SIGNALING	5.16e-11	1	1	1.4e-282	8.13e-128	1.21e-236	0	8.43e-41	8.4e-16	0.937943	0.854779	1.91e-11	0.201153	1.38e-196	1.02e-160	1.21e-125
GO_CELL_CORTEX	4.71e-10	4.2e-34	1	0	1.19e-240	1.83e-174	0	9.02e-44	1.39e-57	4.65e-21	0.985968	8.71e-05	0.999998	8.27e-155	2.78e-206	2.56e-56
GO_CELL_CYCLE_CHECKPOINT	1	0.999788	8.82e-141	8.16e-190	0	0	0	0.0913015	0.0109523	1.49e-42	5.87e-156	1.46e-05	9.19e-85	4.88e-97	7.65e-129	2.48e-277
GO_CELL_CYCLE_G1_S_PHASE_TRANSITION	4.52e-12	1	2.36e-269	4.27e-154	0	0	0	0.0010408	1	0.988431	8.64e-139	2.01e-44	4.45e-216	1.55e-200	1.32e-95	0
GO_CELL_CYCLE_PHASE_TRANSITION	0.00193049	0.956848	5.94e-173	1.3e-220	0	0	0	0.0705584	0.949555	1.28e-14	3.26e-121	7.98e-22	1.2e-110	4.49e-193	5.85e-193	0
GO_CELL_CYCLE_PROCESS	0.937399	0.998216	1.01e-63	4.56e-217	0	0	0	0.000112843	0.00124592	3.39e-19	5.72e-79	0.0170484	2.51e-32	2.52e-132	1.04e-167	7.99e-213
GO_CELL_CYCLE	0.954878	0.998295	9.8e-48	5.23e-210	0	0	0	0.000118209	0.000966424	1.06e-16	2.76e-64	0.0230024	9.26e-26	6.4e-123	3.36e-153	1.06e-190
GO_CELL_DIVISION	0.914322	0.999876	4.61e-98	8.72e-185	0	0	0	0.0640292	0.350174	3.45e-33	5.66e-120	0.0270968	1.17e-42	5.12e-90	2.59e-167	1.73e-238
GO_CELL_FATE_COMMITMENT	2.65e-22	1.64e-06	0.984619	0	1.48e-213	5.62e-296	0	3.47e-31	2.1e-25	0.00115524	0.632078	2.91e-19	0.0207839	3.29e-153	3.02e-131	4.36e-80
GO_CELL_GROWTH	1	0.164201	2.27e-14	2.9e-220	0	1.41e-253	0	0.000172198	3.16e-13	1.3e-45	9.04e-68	2.03e-06	4e-31	1.37e-88	1.68e-132	4.88e-227
GO_CELL_JUNCTION_ASSEMBLY	7.7e-07	6.47e-15	0.0709378	1.11e-287	0	1.26e-225	0	2.58e-21	3.51e-25	2.43e-60	4.77e-47	1.47e-26	2.63e-19	9.61e-36	1.67e-67	6.3e-51
GO_CELL_JUNCTION_ORGANIZATION	0.479959	2.25e-19	0.333099	1.69e-299	0	2.12e-189	0	1.01e-23	2.22e-43	3.27e-47	1.36e-29	2.44e-06	2.31e-07	9.28e-83	6.63e-129	4.77e-56
GO_CELL_JUNCTION	1.84e-12	0.961745	1	4.88e-294	1.73e-171	9.31e-216	0	4.62e-24	2.86e-08	0.000262399	0.0382754	5.14e-12	0.162872	1.98e-170	2.81e-147	3.49e-126
GO_CELL_PROLIFERATION	0.0175756	0.918125	9.57e-11	3.53e-255	6.34e-279	0	0	6.56e-09	3.57e-05	0.00447617	2.09e-11	5.28e-06	2.05e-11	5.15e-207	1.07e-189	8.81e-183
GO_CELL_SUBSTRATE_ADHESION	0.996349	3.56e-25	0.973024	0	0	2.25e-163	0	1.21e-24	9.01e-55	1.36e-50	1.99e-23	0.845105	0.942742	3.01e-106	3.58e-193	6.53e-59
GO_CELLULAR_CARBOHYDRATE_METABOLIC_PROCESS	1	1.63e-15	1	1.76e-256	2.24e-286	2.63e-59	0	0.00271661	3.01e-27	2.01e-30	3.52e-05	1	1	1.69e-139	4.29e-198	1.92e-133
GO_CELLULAR_COMPONENT_DISASSEMBLY	0.953626	4.8e-13	0.0245309	1.16e-293	0	2.41e-172	0	3.42e-10	1.44e-23	1.81e-35	1.98e-28	0.505116	0.0296969	2.42e-112	4.52e-150	3.82e-123
GO_CELLULAR_LIPID_CATABOLIC_PROCESS	0.101493	3.31e-11	0.998272	0	9.56e-258	1.22e-160	0	2.7e-90	5.61e-125	6.11e-15	0.00327209	0.913038	0.996937	1.83e-88	4.43e-150	4.38e-10
GO_CELLULAR_PROCESS_INVOLVED_IN_REPRODUCTION_IN_MULTICELLULAR_ORGANISM	0.0190424	0.831488	5.97e-50	2.5e-229	0	0	0	0.000471257	0.0143315	1.51e-10	1.16e-38	1.42e-15	2.68e-49	3.44e-113	7.44e-89	1.97e-202
GO_CELLULAR_RESPONSE_TO_ABIOTIC_STIMULUS	1	7.84e-13	0.0466351	4.33e-260	0	9.08e-203	0	0.0378487	1.19e-17	7.19e-40	6.19e-26	0.900144	0.00229455	5.58e-78	3.09e-193	1.1e-138
GO_CELLULAR_RESPONSE_TO_ACID_CHEMICAL	4.94e-19	1	1.47e-28	5.19e-263	1.14e-245	0	0	1.48e-27	0.000643321	0.16672	1.72e-23	1.04e-08	9.69e-12	5.05e-172	6.67e-171	1.3e-178
GO_CELLULAR_RESPONSE_TO_DNA_DAMAGE_STIMULUS	0.999973	0.552969	3.92e-25	1.15e-206	0	1.89e-254	0	0.0120407	1.95e-06	4.58e-26	1.19e-56	0.517454	8.17e-14	4.46e-99	8.68e-160	2.08e-146
GO_CELLULAR_RESPONSE_TO_ENDOGENOUS_STIMULUS	5.14e-18	0.984904	0.225735	3.17e-304	8.86e-237	2.51e-290	0	3.36e-29	1.95e-09	4.83e-06	1.13e-09	6.28e-11	0.0100301	7.75e-170	9.31e-174	3.49e-141
GO_CELLULAR_RESPONSE_TO_INSULIN_STIMULUS	0.38031	2.23e-16	0.858116	1.29e-299	0	1.81e-193	0	3.1e-05	3.31e-13	2.48e-42	3.53e-20	0.415193	0.74694	9.65e-146	1.49e-220	1.19e-166
GO_CELLULAR_RESPONSE_TO_OXIDATIVE_STRESS	1.33e-05	3.04e-11	0.62512	0	4.04e-281	4.51e-197	0	3.02e-56	2.73e-66	8.04e-18	1.07e-08	0.0776956	0.920157	9.48e-130	3.67e-176	1.88e-74
GO_CELLULAR_RESPONSE_TO_OXYGEN_LEVELS	0.999943	0.00110209	4.21e-41	3.33e-214	0	0	0	0.565463	0.000851736	2.33e-22	1.1e-37	0.201898	5.98e-31	6.86e-65	4.17e-130	1.23e-141
GO_CELLULAR_RESPONSE_TO_RADIATION	1	0.0148313	6.27e-33	5.52e-161	0	1e-271	0	0.998952	2.27e-05	4.4e-39	7.72e-64	0.330925	5.71e-37	3.35e-74	1.03e-132	3.91e-176
GO_CENTRAL_NERVOUS_SYSTEM_NEURON_DIFFERENTIATION	0.176413	7.68e-12	0.999997	0	3.23e-219	1.24e-174	0	1.42e-64	1.08e-85	3.21e-11	0.0638184	0.662331	0.999749	4.57e-114	1.46e-141	2.8e-30
GO_CENTROSOME	1	0.0427912	2.03e-24	1.25e-192	0	7.32e-261	0	0.639526	8.58e-07	3.57e-16	5.52e-33	0.952292	1.44e-16	9.26e-97	4.73e-177	1.42e-167
GO_CHROMATIN_REMODELING	0.121022	0.364333	2.72e-36	2.05e-231	0	0	0	2.24e-07	1.34e-06	1.54e-41	6.49e-78	0.00112335	7.82e-17	7.18e-90	6.19e-92	1.23e-132
GO_CHROMATIN	2.09e-07	0.0917356	2.63e-16	4.46e-286	0	0	0	2.33e-09	2.82e-05	9.36e-21	3.18e-36	3.01e-07	1.9e-11	4.97e-160	3.59e-158	7.18e-197
GO_CHROMOSOMAL_REGION	0.363574	1	2.04e-156	5.8e-146	0	0	0	0.28834	0.999999	8.94e-31	2.98e-187	0.00306702	3.57e-56	2.88e-156	1.17e-203	0
GO_CHROMOSOME_CENTROMERIC_REGION	0.108938	0.999987	1.83e-182	1.08e-163	0	0	0	0.967954	0.999998	3.42e-66	1.28e-241	1.02e-09	1.86e-81	1.33e-129	2.01e-228	0
GO_CHROMOSOME_ORGANIZATION	0.999611	0.359596	1.16e-31	2.97e-209	0	2.99e-293	0	0.00328874	8.74e-06	4.49e-26	5.35e-58	0.0104501	2.21e-22	8.1e-120	5.63e-151	5.5e-185
GO_CHROMOSOME_SEGREGATION	1	1	1.8e-146	2.25e-121	0	0	0	0.999964	0.68218	2.44e-35	1.86e-168	0.601803	3.31e-85	2.89e-97	2.18e-174	5.86e-291
GO_CHROMOSOME	0.145261	0.639151	9.32e-30	1.3e-249	0	0	0	1.86e-05	0.000561647	9.8e-29	3.67e-64	0.000342332	9.28e-18	3.5e-168	1.61e-196	1.77e-226
GO_CLATHRIN_COATED_VESICLE	2.21e-20	1.98e-10	1	0	1.72e-184	4.9e-167	0	4.89e-35	1.49e-22	3.02e-08	0.999999	2.53e-16	0.982007	5.54e-148	2.38e-103	8.22e-62
GO_COENZYME_BINDING	1	3.94e-25	2.28e-22	3.2e-247	0	2.43e-171	0	0.0862666	1.46e-19	1.13e-41	2.76e-36	1	0.0287978	8.19e-69	2.34e-188	4.33e-111
GO_COFACTOR_BINDING	1	7.58e-42	6.31e-26	2.83e-264	0	1.71e-179	0	0.0254946	4.47e-26	8.56e-58	6.02e-41	1	0.156606	3.57e-70	1.06e-199	9.98e-116
GO_COGNITION	8.69e-26	1	1	0	5.99e-133	1.39e-300	0	2.66e-59	2.67e-17	0.558962	0.615027	1.43e-17	0.402695	7.01e-184	4.05e-162	9.33e-95
GO_CONDENSED_CHROMOSOME	0.999676	0.743081	1.02e-87	1.41e-209	0	0	0	0.975315	0.39438	2.69e-53	1.45e-137	0.000899872	2.98e-53	1.23e-161	2.47e-236	0
GO_CORE_PROMOTER_BINDING	5.61e-10	3.7e-55	0.0213869	0	0	4.71e-253	0	1.93e-33	8.5e-55	1.32e-63	3.72e-26	4.73e-12	1.02e-05	5.16e-65	1.59e-113	6.65e-64
GO_CORE_PROMOTER_PROXIMAL_REGION_DNA_BINDING	1.61e-30	2.51e-11	0.999975	0	7.18e-245	2.12e-261	0	1.39e-27	1.12e-15	7.88e-16	0.00267733	1.07e-14	0.864482	7.67e-131	4.29e-147	1.86e-90
GO_COVALENT_CHROMATIN_MODIFICATION	0.0231986	4.07e-12	1	8.78e-271	1.35e-266	4.9e-173	0	8.98e-09	3.16e-13	7.45e-26	5.18e-06	6.08e-05	0.4977	1.85e-129	2.26e-154	7.19e-119
GO_CYTOKINE_ACTIVITY	4.2e-26	0.0782948	1	0	1.89e-110	1.82e-214	0	8.67e-96	1.51e-68	0.0532767	1	4.76e-19	1	4.81e-227	1.3e-191	5.12e-35
GO_CYTOKINE_RECEPTOR_BINDING	7.36e-37	0.9938	1	0	2.52e-127	2.8e-233	0	6.88e-108	4.79e-58	0.0193472	0.998588	6.45e-18	0.999999	1.58e-278	1.83e-244	9.35e-117
GO_CYTOPLASMIC_REGION	8.58e-08	4.78e-13	1	0	1.71e-235	9.54e-186	0	3.16e-27	1.8e-27	4.57e-17	0.0563179	0.000694938	0.998701	1.06e-153	3.98e-201	2.35e-114
GO_CYTOSKELETAL_PART	0.995722	0.606539	2.08e-15	4.88e-206	1.08e-306	2.47e-289	0	0.0098799	0.000168734	1.38e-10	3.33e-25	0.00328283	2.98e-16	1.05e-117	1.67e-160	8.44e-156
GO_CYTOSOLIC_TRANSPORT	1.16e-26	1	1	0	1.14e-133	1.15e-259	0	3.62e-110	4.92e-59	0.000177648	0.17962	2.83e-41	0.000638121	6.81e-153	3.15e-78	2.94e-31
GO_DEVELOPMENT_OF_PRIMARY_SEXUAL_CHARACTERISTICS	1.04e-10	0.999038	7.62e-32	8.07e-297	6.61e-299	0	0	3.66e-29	3.61e-12	0.15689	7.76e-15	1.27e-11	1.62e-21	2.02e-137	4.57e-90	4.16e-130
GO_DEVELOPMENTAL_GROWTH	0.99999	2.42e-09	2.39e-25	4.53e-279	0	4.36e-245	0	2.65e-11	9.13e-30	3.45e-37	4.05e-50	0.534872	2.96e-14	5.85e-112	4.49e-181	1.16e-132
GO_DIGESTIVE_SYSTEM_DEVELOPMENT	0.990922	2.63e-06	3.83e-49	1.94e-267	0	0	0	8.21e-11	4.59e-25	8.29e-05	1.12e-20	0.00032963	7.06e-38	3.25e-156	1.64e-155	7.98e-147
GO_DIVALENT_INORGANIC_CATION_TRANSMEMBRANE_TRANSPORTER_ACTIVITY	7.2e-55	1	0.996846	0	1.06e-176	0	0	1.96e-88	6.51e-11	0.0177634	1.62e-12	1.88e-33	0.137686	1.41e-206	9.81e-210	5.92e-157
GO_DIVALENT_INORGANIC_CATION_TRANSPORT	1.7e-31	1	1	0	8.28e-125	4.66e-253	0	6.66e-66	2.95e-15	0.00883134	0.0744983	1.89e-27	0.266547	2.58e-122	1.91e-106	1.86e-65
GO_DNA_BIOSYNTHETIC_PROCESS	1	1	9.62e-87	3.47e-92	0	0	0	1	0.990234	5.11e-26	3.32e-132	4.09e-25	8.59e-129	6.63e-105	4.41e-75	3.02e-274
GO_DNA_CONFORMATION_CHANGE	1	1	7.8e-78	2.26e-121	0	0	0	0.74233	0.631382	1.22e-55	1.33e-143	0.00559054	5e-49	6.97e-53	9.7e-95	7.36e-182
GO_DNA_INTEGRITY_CHECKPOINT	0.999922	0.999969	1.9e-105	8.98e-207	0	0	0	2.44e-05	4.3e-05	5.05e-56	1.16e-145	0.000137902	7.02e-59	8.9e-44	8.96e-113	5.31e-201
GO_DNA_METABOLIC_PROCESS	0.961673	0.989194	5.35e-57	1.36e-198	0	0	0	0.00920995	0.0111997	1.3e-23	8.19e-81	0.030399	7.24e-30	3.68e-108	2.27e-160	2.38e-185
GO_DNA_RECOMBINATION	0.171759	1	4.4e-84	3.22e-199	0	0	0	4.82e-12	0.000636992	1.58e-31	1.72e-129	0.000228819	1.74e-43	1.58e-95	3.9e-109	5.22e-144
GO_DNA_REPAIR	1	0.085314	1.56e-33	3.54e-216	0	2.92e-272	0	0.0329344	1.76e-08	3.32e-39	1.68e-77	0.64406	1.24e-19	5.88e-97	2.05e-170	1.93e-148
GO_DNA_REPLICATION	0.99995	0.999163	1.04e-174	6.14e-158	0	0	0	0.794274	0.292568	6.7e-90	7.52e-258	0.458316	2.65e-69	2.25e-56	7.33e-169	9.33e-230
GO_DOUBLE_STRANDED_DNA_BINDING	2.18e-27	3.32e-12	0.807827	0	3.86e-303	3e-269	0	2.04e-22	6.48e-13	2.23e-21	5.2e-08	1.35e-07	0.986149	2.63e-152	2.55e-183	1.48e-123
GO_EMBRYONIC_SKELETAL_SYSTEM_DEVELOPMENT	7.69e-64	0.970816	0.96672	0	6.61e-136	0	0	1.6e-40	7.26e-09	0.382141	0.39512	1.19e-62	1.16e-24	8.32e-143	1.24e-45	2.7e-68
GO_ENDOCYTIC_VESICLE_MEMBRANE	2.55e-48	0.195029	1	0	1.95e-90	4.46e-235	0	1.53e-41	8.47e-14	0.0600024	1	6.16e-56	0.162111	4.52e-135	1.87e-56	7.59e-39
GO_ENDOCYTIC_VESICLE	1.03e-14	2.41e-05	1	0	3.44e-164	1e-204	0	6.05e-29	7.49e-21	1.25e-08	0.979553	2.41e-34	1.94e-05	1.62e-112	2e-65	6.74e-43
GO_ENERGY_DERIVATION_BY_OXIDATION_OF_ORGANIC_COMPOUNDS	1	3.44e-11	1	4.29e-282	4.65e-295	1.49e-85	0	2.34e-06	2.77e-27	3.16e-32	6.4e-07	0.999996	0.999997	1.53e-121	1.47e-176	2.48e-110
GO_ENZYME_INHIBITOR_ACTIVITY	1	4.36e-26	0.33091	2.01e-303	0	8.74e-184	0	4.05e-12	1.55e-45	5.48e-35	2.2e-14	0.0633023	9.48e-08	1.74e-93	3.04e-126	1.09e-83
GO_EPIDERMIS_DEVELOPMENT	0.999456	2.63e-05	4.9e-15	1.44e-194	3.25e-283	1.73e-225	0	0.505234	3.25e-05	6.24e-15	2.75e-23	0.240881	6.71e-11	3.22e-71	2.08e-129	1.52e-130
GO_EPITHELIAL_CELL_DEVELOPMENT	1.96e-08	1	5.9e-37	1.89e-249	4.04e-284	0	0	1.47e-19	0.0142351	0.952284	5.58e-22	1.58e-13	2.72e-26	9.48e-227	1.11e-197	2.46e-235
GO_ER_TO_GOLGI_VESICLE_MEDIATED_TRANSPORT	0.999093	1.54e-20	1	0	2.98e-276	9.71e-107	0	1.17e-32	7.31e-71	6.15e-40	4.38e-13	0.979596	0.997999	4.16e-84	5.31e-154	2.46e-64
GO_ESTABLISHMENT_OR_MAINTENANCE_OF_CELL_POLARITY	0.00232116	2.44e-11	0.999959	0	0	1.64e-192	0	3.36e-21	9.67e-27	1.38e-53	2.04e-29	0.0692207	0.990549	8.37e-95	1.64e-182	4.51e-132
GO_EXCITATORY_SYNAPSE	1.99e-52	1	1	0	1.11e-94	6.05e-232	0	1.18e-124	1.07e-42	0.993374	1	1.35e-30	0.894687	7.21e-221	2.99e-108	7.3e-72
GO_EXTRACELLULAR_MATRIX	0.000630511	1	4.15e-14	1.66e-243	6.93e-218	0	0	2.46e-23	0.00028992	0.589287	5.13e-17	4.68e-13	3.85e-24	1.29e-194	4.29e-162	2.31e-198
GO_FEMALE_SEX_DIFFERENTIATION	1.36e-07	3.16e-06	2.54e-30	0	0	0	0	9.78e-19	1.93e-13	5.72e-05	3.46e-14	2.67e-19	2.61e-27	1.75e-163	2.47e-117	3.39e-166
GO_FORMATION_OF_PRIMARY_GERM_LAYER	7.66e-18	0.00625954	0.988178	0	9.68e-211	1.95e-263	0	2.51e-31	1.58e-14	5.76e-07	0.0362308	7.36e-16	0.00250443	1.12e-178	3.3e-174	3.04e-140
GO_G_PROTEIN_COUPLED_RECEPTOR_BINDING	4.61e-21	1	0.301432	3.18e-272	4.16e-153	6.94e-259	0	1.1e-37	1.61e-05	0.883033	0.00392285	3.32e-16	1.94e-05	2.25e-149	4.42e-94	3.07e-95
GO_G_PROTEIN_COUPLED_RECEPTOR_SIGNALING_PATHWAY_COUPLED_TO_CYCLIC_NUCLEOTIDE_SECOND_MESSENGER	2.4e-12	1	1	4.02e-227	3.09e-93	7.24e-269	0	1.32e-40	1.88e-05	0.999874	0.695184	6.91e-23	0.00805534	3.14e-180	2e-149	1.42e-112
GO_GATED_CHANNEL_ACTIVITY	1.5e-45	1	0.733329	3.21e-272	3e-116	0	0	6.19e-55	0.353153	1	0.011616	1.06e-45	3.15e-08	1.7e-210	5.53e-124	1.8e-162
GO_GENE_SILENCING	1	1.03e-35	1	7.1e-299	6.06e-282	1.4e-69	0	2.62e-17	9.84e-69	1.06e-92	4.07e-31	1	1	1.66e-27	5.58e-151	2.9e-47
GO_GERM_CELL_DEVELOPMENT	1.06e-06	0.99876	1.35e-53	1.13e-234	0	0	0	5.8e-06	0.173322	1.3e-07	1.73e-40	1.02e-21	1.66e-52	2.02e-108	9.04e-67	3.32e-185
GO_GLAND_DEVELOPMENT	0.00556416	0.179342	6.29e-29	3.06e-275	0	0	0	2.89e-10	2.13e-08	4.81e-11	5.27e-31	1.53e-07	1.35e-19	2.47e-143	8.87e-194	4.86e-180
GO_GLIAL_CELL_DIFFERENTIATION	0.999983	0.350934	1.37e-37	2.95e-178	0	3.17e-261	0	0.329735	0.00797357	2.17e-05	6.58e-28	0.959984	7.03e-11	7.85e-84	6.84e-129	4.17e-142
GO_GLIOGENESIS	0.973626	0.0146848	5.87e-20	4.92e-207	3.1e-298	6.35e-276	0	0.00985402	1.88e-05	9.97e-05	4.33e-13	0.0218272	8.71e-13	6.01e-96	8.34e-125	7.31e-136
GO_GLYCOSAMINOGLYCAN_BINDING	0.99755	1	2.71e-12	4.26e-135	7.38e-146	1.36e-305	0	8.68e-17	0.747103	1	2.85e-13	1.02e-11	3.63e-31	5e-134	1.71e-68	4.53e-112
GO_GROWTH_FACTOR_RECEPTOR_BINDING	2.38e-45	1	1	0	5.59e-125	0	0	5.69e-99	4.47e-19	0.895362	0.317883	1.49e-43	0.528876	3.61e-259	2.86e-201	3.19e-115
GO_GROWTH	1	0.000154944	6.5e-29	5.13e-241	0	4.16e-259	0	7.55e-06	4.54e-19	1.87e-24	2.53e-42	0.365063	9.18e-20	7.54e-107	2.03e-160	6.11e-164
GO_GTPASE_ACTIVITY	4.84e-23	1	0.986365	2.73e-265	1.92e-170	4.46e-262	0	7.34e-26	0.0851671	1.41e-05	9.04e-13	2.54e-18	0.00338628	3.33e-142	2.11e-117	6.54e-142
GO_GTPASE_BINDING	1.35e-05	6.34e-14	0.252191	0	2.48e-296	2.44e-219	0	1.59e-15	8.8e-22	1.48e-25	9.28e-15	0.0303717	0.396693	2.26e-102	6.29e-147	1.14e-110
GO_GUANYL_NUCLEOTIDE_EXCHANGE_FACTOR_ACTIVITY	4.86e-24	1	0.259347	0	4.25e-197	4.98e-278	0	2.94e-45	1.08e-10	0.280832	5.03e-05	7e-13	0.00732594	1.71e-164	1.4e-137	8.75e-98
GO_HEART_MORPHOGENESIS	4.74e-05	8.24e-18	0.000731737	9.48e-306	0	3.98e-145	0	2.78e-19	2.58e-26	2.53e-65	1.08e-53	0.999997	0.999999	1.02e-61	2.09e-172	2.86e-71
GO_HEMOSTASIS	7.21e-34	1	1	0	4.55e-121	5.15e-252	0	6.2e-42	5.17e-07	0.0114073	0.529192	1.84e-34	0.474627	2.96e-205	4.9e-111	1.65e-106
GO_HEPARIN_BINDING	0.99991	1	1.23e-18	3.6e-104	4.81e-145	5.65e-291	0	3.4e-12	0.994619	0.999997	2.04e-19	3.67e-06	2.01e-27	1.27e-107	3.56e-68	9.85e-112
GO_HORMONE_MEDIATED_SIGNALING_PATHWAY	3.12e-136	1	0.99568	0	1.26e-140	0	0	6.43e-172	2.04e-53	0.96383	0.065436	5.59e-24	1	1.23e-175	1.22e-136	8.99e-19
GO_HORMONE_RECEPTOR_BINDING	2.65e-28	1.06e-15	1	0	2.95e-246	1.57e-208	0	4.12e-70	6.21e-50	1.11e-35	2.63e-08	4.16e-06	1	9.24e-93	4.72e-161	1.73e-55
GO_IMMUNE_SYSTEM_DEVELOPMENT	5.42e-27	0.0145402	1	0	1.77e-209	1.01e-262	0	1.2e-51	8.35e-30	7.87e-08	0.0723247	1.43e-17	0.44811	5.12e-211	7.87e-186	5.73e-118
GO_IN_UTERO_EMBRYONIC_DEVELOPMENT	1	1.21e-23	9.81e-19	5.55e-288	0	8.88e-222	0	0.000481715	5.56e-27	1.22e-51	1.32e-43	0.989856	3.44e-07	1.23e-111	8.87e-186	2.01e-176
GO_INORGANIC_CATION_TRANSMEMBRANE_TRANSPORTER_ACTIVITY	1.79e-23	1	0.00106443	8.72e-239	3.24e-198	0	0	5.25e-35	0.0903873	0.70443	6.46e-14	2.51e-18	5.79e-05	1.31e-174	3.52e-144	1.32e-148
GO_INORGANIC_ION_TRANSMEMBRANE_TRANSPORT	2.03e-37	1	0.810411	8.52e-279	6.87e-164	0	0	6.38e-51	0.0068241	0.878414	1e-07	3.43e-27	0.00292743	3.11e-186	6.01e-141	1.12e-136
GO_INTERACTION_WITH_HOST	1	1.92e-25	0.00384506	9.62e-234	0	1.93e-125	0	2.24e-15	5.77e-66	2.48e-57	2.85e-36	1	0.151054	1.03e-94	6.09e-205	1.06e-56
GO_INTERMEDIATE_FILAMENT_CYTOSKELETON	3.99e-24	1	1.62e-31	9.24e-202	1.42e-307	0	0	1.23e-11	0.996943	9.49e-29	1.5e-82	7.07e-11	6.12e-08	2.92e-59	3.99e-163	1.81e-186
GO_INTRINSIC_APOPTOTIC_SIGNALING_PATHWAY	1	6.74e-24	2.4e-33	1.87e-271	0	2.74e-249	0	0.0978165	5.22e-24	1.32e-60	1.66e-66	0.886946	4.43e-19	5.13e-40	6.11e-151	1.88e-145
GO_ION_TRANSMEMBRANE_TRANSPORT	1.62e-27	1	0.416577	2.57e-262	1.19e-192	0	0	6.87e-34	0.0530825	0.0787717	1.14e-11	2.81e-15	0.103071	1.03e-166	2.62e-143	5.61e-152
GO_KIDNEY_EPITHELIUM_DEVELOPMENT	5.52e-13	1.19e-05	1.26e-14	0	0	0	0	1.04e-12	5.98e-09	7.82e-17	1.5e-21	1.69e-30	3.06e-31	6.44e-158	6.95e-141	2.82e-151
GO_KINASE_BINDING	0.998881	2.3e-33	0.991343	0	3.49e-307	3.22e-159	0	1.24e-15	2.56e-50	4.48e-23	0.0105324	0.95161	0.898932	6.39e-136	4.28e-174	2.65e-94
GO_LEUKOCYTE_ACTIVATION	4.24e-19	0.76515	1	0	6.4e-171	8.81e-250	0	2.5e-56	1.1e-30	0.000376994	0.853535	4.35e-16	0.989072	4.67e-214	7.68e-188	2.01e-84
GO_LEUKOCYTE_CELL_CELL_ADHESION	6.56e-16	1.99e-05	1	0	3.98e-141	2.14e-209	0	1.5e-49	1.17e-43	1.54e-05	1	5.44e-22	0.999558	4.76e-211	4.57e-190	4.06e-106
GO_LEUKOCYTE_DIFFERENTIATION	3.45e-46	0.0087089	1	0	4.9e-151	1.97e-238	0	5.35e-73	8.65e-38	7.11e-08	0.999985	8.04e-37	0.99596	5.56e-239	1.1e-168	1.37e-107
GO_LIGAND_GATED_CHANNEL_ACTIVITY	5.58e-48	1	1	1.25e-288	8.19e-72	2.88e-275	0	6e-44	0.506641	1	1	1.08e-36	0.99757	7.8e-209	4.93e-130	1.28e-143
GO_LIGASE_ACTIVITY	0.0104875	2.9e-13	0.325231	3.48e-294	0	5.7e-194	0	2.09e-24	7.15e-36	2.48e-70	3.45e-52	0.0174271	0.199809	1.09e-69	3.32e-144	4.65e-70
GO_LIPID_MODIFICATION	3.81e-31	0.999998	2.54e-19	0	3.71e-249	0	0	2.18e-73	3.13e-25	0.84716	4e-11	1.66e-53	2.53e-42	1.77e-149	1.17e-38	4.65e-55
GO_LYASE_ACTIVITY	0.999999	0.00145249	2.04e-33	8.54e-230	0	5.8e-226	0	2.27e-06	1.88e-14	3.55e-11	1.85e-29	0.584148	1.53e-14	3.56e-71	1.09e-99	1.52e-100
GO_LYMPHOCYTE_ACTIVATION	2e-23	0.114051	1	0	8.82e-176	1.35e-240	0	6.79e-64	4.38e-40	1.59e-05	0.978553	3.1e-17	0.999864	1.16e-208	2.68e-186	2.5e-76
GO_LYMPHOCYTE_DIFFERENTIATION	2.21e-48	0.0304624	1	0	1.3e-148	3.23e-254	0	2.2e-87	6.82e-44	1.44e-05	1	2.97e-42	0.987984	1.84e-227	7.11e-149	1.09e-71
GO_LYTIC_VACUOLE_MEMBRANE	0.999998	4.03e-16	1	4.09e-273	1.47e-269	6.42e-77	0	1.37e-13	2.25e-37	1.28e-33	0.0490558	1	1	2.86e-92	2.04e-171	1.04e-67
GO_MACROMOLECULAR_COMPLEX_DISASSEMBLY	0.0260791	2e-44	1	0	0	8.63e-149	0	0.000557014	6.79e-19	1.52e-47	1.12e-05	0.00305341	0.704327	1e-110	2.85e-146	2.7e-119
GO_MACROMOLECULE_METHYLATION	2.59e-05	7.83e-22	1	0	3.16e-235	4.09e-233	0	1.18e-12	2.09e-20	4.6e-12	0.978452	5.83e-19	1.51e-05	7.01e-192	1.68e-178	1.2e-172
GO_MAGNESIUM_ION_BINDING	1	8.69e-13	4.04e-12	2.32e-212	0	7.57e-185	0	0.485615	5.17e-13	2.83e-49	1.38e-51	0.485635	5.58e-12	3.56e-76	4.93e-107	1.93e-137
GO_MALE_SEX_DIFFERENTIATION	1.14e-39	1	1.63e-37	1.23e-279	1.8e-248	0	0	4.05e-39	0.0150799	0.998258	2.18e-19	2.98e-43	1.7e-43	4.11e-178	3.59e-75	3.79e-149
GO_MAMMARY_GLAND_DEVELOPMENT	3.23e-08	1	3.62e-34	1.91e-219	1.87e-256	0	0	2.56e-12	0.0801274	0.0540452	4.87e-25	7.07e-09	4.18e-19	3.82e-147	1.29e-152	6.12e-185
GO_MEIOTIC_CELL_CYCLE_PROCESS	9.55e-23	1	1.21e-92	1.43e-284	0	0	0	8.07e-32	0.00262801	8.63e-21	8.91e-121	7.62e-27	2.16e-51	4.26e-179	1.4e-127	1.43e-256
GO_MEIOTIC_CELL_CYCLE	1.46e-19	1	4.78e-106	2.27e-274	0	0	0	2.31e-30	0.0777515	1.56e-13	7.24e-124	1.05e-30	4.12e-70	1.56e-186	5.18e-124	1.56e-288
GO_MESENCHYMAL_CELL_DIFFERENTIATION	9.21e-06	0.895099	8.01e-39	2.15e-225	0	0	0	3.46e-15	5.07e-10	8.15e-10	9.67e-37	2.35e-07	3.43e-26	1.32e-123	3.33e-112	1.06e-126
GO_MESENCHYME_DEVELOPMENT	5.11e-40	0.491505	3.64e-24	0	1.63e-278	0	0	2.67e-35	1.21e-12	0.000123087	1.97e-18	1.89e-20	2.01e-19	4.18e-157	1.63e-110	6.89e-114
GO_METAL_ION_TRANSMEMBRANE_TRANSPORTER_ACTIVITY	5.05e-20	1	4.14e-10	3.77e-216	5.2e-205	0	0	1.45e-28	0.650556	0.932748	7.98e-19	1.5e-33	3.65e-21	4.91e-188	5.24e-120	1.63e-170
GO_METAL_ION_TRANSPORT	6.22e-22	1	0.244677	2.31e-265	1.29e-195	1.73e-298	0	5.92e-38	0.000879612	0.0312096	1.99e-13	1.47e-14	0.00190127	1.02e-142	1.32e-125	3.98e-116
GO_METALLOPEPTIDASE_ACTIVITY	5.24e-23	1	0.956953	0	4.25e-159	1.4e-301	0	1.28e-74	2.25e-26	0.157775	0.00933479	4.5e-24	1.38e-05	3.85e-228	7.28e-184	1.22e-186
GO_MICROTUBULE_BASED_MOVEMENT	2.06e-10	1	2.71e-38	3.94e-282	0	0	0	9.09e-32	1.19e-08	9.25e-14	2.21e-60	3.82e-21	6.97e-34	4.13e-179	1.25e-148	2.31e-198
GO_MICROTUBULE_BASED_PROCESS	0.999832	0.999923	3.64e-50	1.97e-184	0	0	0	0.00424774	0.0033011	1.45e-09	4.36e-52	0.053971	8.23e-30	1.25e-136	7.81e-189	1.23e-207
GO_MICROTUBULE_BINDING	1	0.535424	1.86e-39	1.43e-204	0	0	0	0.0434719	2.44e-07	2.08e-07	2.7e-29	0.0307689	1.16e-36	6.32e-100	5.54e-170	6.79e-180
GO_MICROTUBULE_CYTOSKELETON_ORGANIZATION	1	0.164971	1.59e-57	1.96e-141	0	0	0	0.999811	0.00720006	2.1e-15	4.51e-53	0.967186	2.25e-37	1.04e-110	2.71e-185	5.47e-216
GO_MICROTUBULE_CYTOSKELETON	1	0.0785993	4.8e-16	7.55e-202	0	1.5e-260	0	0.0841702	2.89e-08	2.06e-15	5.78e-28	0.646807	5.68e-14	3.21e-117	7.03e-180	2.3e-166
GO_MICROTUBULE_ORGANIZING_CENTER	1	0.31595	1.75e-13	8.6e-186	0	4.57e-241	0	0.303991	4.59e-06	4.26e-19	2.09e-32	0.828048	1.03e-11	9.3e-98	1.35e-178	4.87e-165
GO_MICROTUBULE	0.999999	0.956005	3.07e-18	4.29e-200	3.57e-271	0	0	0.0272446	0.000205011	0.0105906	1.79e-14	7.6e-12	5.57e-41	2.86e-157	1.43e-141	9.07e-190
GO_MIDBODY	1	9.52e-11	3.97e-75	4.42e-188	0	0	0	0.999999	1.07e-08	1.2e-72	3.68e-116	0.942264	3.46e-47	1.71e-55	4.81e-212	6.3e-267
GO_MITOCHONDRIAL_MATRIX	1	9.67e-25	0.774882	3.37e-281	0	1.48e-155	0	0.000510472	2.18e-28	5.39e-53	1.15e-25	0.858745	0.0331727	3.29e-93	2.51e-185	1.64e-136
GO_MITOTIC_CELL_CYCLE_CHECKPOINT	0.999998	0.998773	1.7e-85	1.44e-197	0	0	0	0.000106108	3.22e-05	2.75e-43	2.8e-122	3.39e-09	3.89e-66	8.66e-90	2.48e-103	2.43e-245
GO_MITOTIC_CELL_CYCLE	0.999982	0.999214	1.13e-97	1.23e-184	0	0	0	0.0914196	0.0457354	1.58e-22	1.54e-107	0.015749	8.68e-54	1.15e-110	5.43e-147	1.86e-224
GO_MITOTIC_NUCLEAR_DIVISION	1	0.997877	1.43e-136	8.19e-152	0	0	0	0.988135	0.40386	6.44e-44	6.63e-158	0.0411299	2.91e-75	1.02e-59	1.12e-143	3.54e-261
GO_MONOVALENT_INORGANIC_CATION_TRANSMEMBRANE_TRANSPORTER_ACTIVITY	3.23e-20	1	0.0251356	4.63e-220	1.9e-185	0	0	2.4e-26	0.20256	0.93192	1.11e-08	7.84e-15	0.00760581	6.75e-160	1.58e-128	4.2e-137
GO_MORPHOGENESIS_OF_A_BRANCHING_STRUCTURE	1.05e-05	0.655166	8.15e-27	1.64e-220	0	0	0	9.91e-05	0.0776884	5.95e-14	1.02e-34	9.27e-11	5.36e-24	2.33e-144	1.98e-165	2.17e-199
GO_MORPHOGENESIS_OF_EMBRYONIC_EPITHELIUM	5.11e-17	0.0284435	8.88e-107	5.59e-260	0	0	0	3.91e-25	1.62e-10	1.8e-86	2.02e-173	4.39e-16	3.37e-44	3.08e-11	8.18e-55	1.3e-92
GO_MULTI_ORGANISM_REPRODUCTIVE_PROCESS	4.2e-12	0.924397	0.00116562	7.03e-288	1.84e-213	4.62e-290	0	1.41e-21	2.86e-09	0.000589303	6.66e-08	6.28e-12	1.09e-06	1.72e-123	2.32e-129	3.34e-128
GO_MUSCLE_CELL_DIFFERENTIATION	6.99e-80	1.31e-05	0.999994	0	5.63e-233	0	0	6.37e-40	1.44e-06	3.21e-15	0.00183426	3.44e-49	0.0380205	6.82e-186	1.6e-147	4.34e-148
GO_MUSCLE_CONTRACTION	1.37e-28	1	0.987456	0	7.51e-139	2.7e-281	0	2.08e-56	1.13e-13	0.886875	0.494642	4.04e-23	0.00137178	6.82e-162	1.35e-102	1.23e-98
GO_MUSCLE_ORGAN_DEVELOPMENT	4.11e-41	0.590456	0.935633	2.77e-297	2.07e-209	0	0	5.82e-21	0.0119548	3.04e-10	2.17e-08	1.08e-31	4.12e-05	9.71e-140	1.69e-111	3.63e-128
GO_MUSCLE_STRUCTURE_DEVELOPMENT	1.44e-43	0.000384181	0.998101	0	9.88e-237	1.19e-298	0	2.44e-23	3.5e-05	1.59e-15	3.49e-07	5.94e-26	0.0324327	7.17e-143	3.15e-131	3.42e-130
GO_MUSCLE_SYSTEM_PROCESS	6.81e-21	0.994198	1	0	9.64e-154	2.49e-249	0	1.23e-52	5.71e-23	0.0281373	0.371105	9.65e-20	0.0629967	3.05e-160	4.19e-114	5.64e-100
GO_MUSCLE_TISSUE_DEVELOPMENT	3.98e-59	1.46e-06	0.999797	0	2.92e-242	0	0	1.65e-36	2.18e-10	1.67e-19	1.1e-07	1.05e-37	0.00133373	3.68e-152	2.53e-146	1.54e-131
GO_MYELIN_SHEATH	1	2.99e-57	7.1e-12	2.8e-235	0	5.72e-127	0	0.545901	2.65e-51	2.69e-33	2.42e-11	1	4e-05	2.61e-64	2.95e-155	4.87e-63
GO_MYELOID_CELL_DIFFERENTIATION	3.28e-65	0.000157654	1	0	2.04e-178	4.86e-273	0	1.24e-53	4.99e-20	4.49e-16	0.0639676	1.11e-33	0.999981	1.18e-180	1.83e-210	1.73e-157
GO_NEGATIVE_REGULATION_OF_APOPTOTIC_SIGNALING_PATHWAY	1	2.13e-28	0.18162	2.86e-243	0	1.09e-125	0	1.16e-05	3.4e-41	3.87e-35	3.08e-12	0.999999	0.0599858	1.88e-86	5.44e-138	1.1e-69
GO_NEGATIVE_REGULATION_OF_CATALYTIC_ACTIVITY	1	5.76e-16	1.29e-05	1.33e-281	0	3.78e-193	0	2.51e-12	1.87e-39	1e-24	1.73e-17	0.563905	3.26e-07	6.65e-99	2.61e-140	2.37e-103
GO_NEGATIVE_REGULATION_OF_CELL_CELL_ADHESION	4.61e-08	5.92e-15	0.999589	0	0	2.87e-208	0	3.42e-63	7.54e-78	2.4e-18	0.0145054	0.847126	1	1.46e-178	9.37e-228	1.65e-73
GO_NEGATIVE_REGULATION_OF_CELL_CYCLE_PHASE_TRANSITION	0.998984	0.54471	1.82e-80	1.03e-212	0	0	0	0.00165587	4.45e-05	3.05e-35	2.64e-94	0.0201604	2.33e-39	1.37e-94	1.29e-185	6e-241
GO_NEGATIVE_REGULATION_OF_CELL_CYCLE_PROCESS	0.921745	0.660406	7.66e-106	2.95e-230	0	0	0	0.000898618	0.000374918	4.7e-37	4.56e-110	0.124386	4.1e-42	7.26e-83	2.59e-165	3.07e-229
GO_NEGATIVE_REGULATION_OF_CELL_CYCLE	0.874803	0.0741601	6.76e-36	8.83e-268	0	1.15e-293	0	5.05e-11	8.16e-14	3.65e-18	4.25e-44	0.136469	3.76e-17	2.82e-129	4.82e-161	1.96e-179
GO_NEGATIVE_REGULATION_OF_CELL_GROWTH	0.00131503	0.313504	3.62e-17	0	2.73e-282	0	0	1.64e-35	3.88e-29	0.039768	1.84e-11	1.14e-05	1.04e-14	1.43e-228	8.41e-228	8.59e-190
GO_NEGATIVE_REGULATION_OF_CYTOKINE_PRODUCTION	1.51e-25	0.00397379	1	0	8.87e-182	5.18e-242	0	1.98e-56	1.83e-35	0.0124733	0.999979	4.56e-12	0.998953	3.28e-198	5.93e-138	6.68e-61
GO_NEGATIVE_REGULATION_OF_CYTOSKELETON_ORGANIZATION	0.916098	0.000320738	5.1e-75	9.64e-177	0	0	0	0.984504	0.33253	2.98e-20	4.23e-54	1.23e-27	7.5e-86	5.92e-69	3.37e-65	5.64e-203
GO_NEGATIVE_REGULATION_OF_HYDROLASE_ACTIVITY	1	4.43e-51	6.37e-05	4.88e-291	0	6.97e-166	0	2.39e-07	1.45e-60	1.16e-38	6.81e-15	0.893655	1.88e-09	9.13e-70	1.82e-118	1.39e-72
GO_NEGATIVE_REGULATION_OF_INTRACELLULAR_SIGNAL_TRANSDUCTION	0.995742	2.92e-13	0.775292	5.62e-246	8.12e-305	5.73e-201	0	0.0164985	4.92e-13	4.82e-27	2.18e-11	0.056087	0.00311819	2.44e-114	1.84e-152	1.59e-130
GO_NEGATIVE_REGULATION_OF_KINASE_ACTIVITY	0.533648	2.39e-14	6.26e-07	3.06e-308	1.02e-285	6.18e-217	0	1.3e-23	8.16e-41	1.44e-21	7.05e-19	0.295052	0.000298318	1.49e-106	3.15e-161	6.1e-101
GO_NEGATIVE_REGULATION_OF_LOCOMOTION	2.14e-07	0.0125336	1.86e-22	7.33e-270	0	0	0	3.21e-15	3.09e-10	0.000482639	1.73e-15	5.46e-17	7.99e-23	3.37e-181	1.22e-100	4.59e-135
GO_NEGATIVE_REGULATION_OF_MITOTIC_CELL_CYCLE	1	0.00201415	1.15e-75	3.93e-235	0	3.66e-301	0	0.00826332	6.94e-12	1.24e-80	1.89e-141	0.567755	6.15e-33	2.08e-87	5.19e-219	3.77e-253
GO_NEGATIVE_REGULATION_OF_MOLECULAR_FUNCTION	0.984573	6.59e-14	0.000219896	3.22e-299	0	1e-215	0	7.76e-12	3.56e-29	3.71e-27	2.46e-19	0.0978425	1.17e-05	2.54e-101	6.12e-148	1.25e-130
GO_NEGATIVE_REGULATION_OF_NERVOUS_SYSTEM_DEVELOPMENT	0.0596047	3.43e-16	0.000983852	0	8.54e-303	2.63e-231	0	8.73e-31	1.38e-48	8.96e-24	1.59e-14	0.179342	0.0289316	2.34e-114	5.59e-182	1.83e-95
GO_NEGATIVE_REGULATION_OF_NEURON_APOPTOTIC_PROCESS	0.249057	0.0938911	1.77e-54	0	0	0	0	6.42e-28	2.56e-27	4.92e-43	1e-84	0.0140325	4.06e-36	2.14e-57	8.63e-174	1.51e-123
GO_NEGATIVE_REGULATION_OF_NEURON_DEATH	0.349237	0.0253412	3.34e-26	0	0	4.79e-308	0	2.65e-40	1.11e-43	2.98e-26	5.71e-45	0.000508523	2.4e-21	1.05e-90	2.13e-171	6.47e-105
GO_NEGATIVE_REGULATION_OF_ORGANELLE_ORGANIZATION	0.995022	0.00417565	5.77e-47	1.05e-219	0	0	0	0.161399	6.07e-05	3.65e-20	1.8e-51	5.12e-09	6.78e-46	5.91e-108	1.51e-106	1.33e-186
GO_NEGATIVE_REGULATION_OF_PEPTIDASE_ACTIVITY	1	5.44e-73	0.440399	0	0	1.26e-138	0	2.22e-08	6.58e-78	4.03e-51	1.97e-10	0.883872	1.05e-05	1.28e-65	3.29e-127	6.18e-64
GO_NEGATIVE_REGULATION_OF_PHOSPHORYLATION	0.000620942	1.06e-11	0.0690822	0	1.22e-300	2.29e-247	0	3.56e-20	1.41e-27	8.19e-21	2.19e-13	1.59e-06	2.73e-05	1.62e-142	1.78e-168	2.08e-135
GO_NEGATIVE_REGULATION_OF_PROTEIN_COMPLEX_DISASSEMBLY	0.999981	0.999904	1.74e-106	5.63e-127	0	0	0	0.998118	0.997602	4.28e-17	2.49e-89	2.66e-38	1.96e-134	8.21e-91	3.31e-79	1.83e-274
GO_NEGATIVE_REGULATION_OF_PROTEIN_SERINE_THREONINE_KINASE_ACTIVITY	2.41e-06	3.73e-16	1.29e-12	0	2.36e-304	1.44e-275	0	4.98e-30	6.15e-40	9.25e-23	3.74e-27	6.33e-11	3.81e-13	6.16e-126	1.29e-136	4.14e-114
GO_NEGATIVE_REGULATION_OF_PROTEOLYSIS	1	4.18e-26	0.0461982	2.6e-264	0	1.68e-174	0	0.0307846	3.33e-29	7.67e-51	1.5e-28	0.952075	2.41e-05	5.27e-77	7.72e-158	8.33e-128
GO_NEGATIVE_REGULATION_OF_RESPONSE_TO_EXTERNAL_STIMULUS	1.83e-19	0.931755	0.998426	0	5.67e-191	1.34e-291	0	7.93e-31	1.83e-09	0.00616495	0.0358441	1.54e-19	0.00157695	1.28e-204	1.85e-147	2.42e-118
GO_NEGATIVE_REGULATION_OF_SEQUENCE_SPECIFIC_DNA_BINDING_TRANSCRIPTION_FACTOR_ACTIVITY	6.61e-05	2.87e-35	0.196974	0	0	5.61e-207	0	5.7e-17	3.4e-36	5.53e-41	4.99e-19	5.33e-12	2.55e-09	1.08e-95	8.32e-105	8.66e-102
GO_NEGATIVE_REGULATION_OF_TRANSCRIPTION_FROM_RNA_POLYMERASE_II_PROMOTER	7.22e-08	3.31e-13	0.00137295	0	1.61e-302	2.36e-281	0	1.43e-15	7.56e-19	1.9e-16	2.31e-09	1.94e-08	1.17e-05	2.27e-139	1.18e-146	5.71e-118
GO_NEGATIVE_REGULATION_OF_WNT_SIGNALING_PATHWAY	3.97e-18	0.000343607	2.28e-23	2.14e-288	7.65e-244	6.23e-291	0	2.99e-18	8.47e-09	0.0650514	2.29e-11	2.45e-09	6.13e-14	1.82e-116	1.27e-80	1.1e-91
GO_NEURAL_TUBE_DEVELOPMENT	0.0121391	0.267318	8.01e-100	7.86e-210	0	0	0	3.26e-05	0.000105462	4.34e-70	2.35e-152	0.322888	2.37e-29	3.59e-13	6.33e-109	1.26e-156
GO_NON_CANONICAL_WNT_SIGNALING_PATHWAY	0.00146711	7.35e-20	8.01e-23	0	0	2.09e-228	0	1.69e-10	2.5e-19	5.5e-26	1.56e-38	0.201572	2.2e-07	2.67e-83	5.41e-139	8.34e-115
GO_NUCLEAR_CHROMOSOME_SEGREGATION	1	1	1.71e-178	9.35e-137	0	0	0	0.972683	0.26786	6.87e-33	1.4e-177	0.902635	1.97e-89	1.76e-102	1.45e-177	2.51e-294
GO_NUCLEAR_CHROMOSOME	0.967824	0.418573	1.8e-28	2.56e-242	0	7.61e-283	0	0.000210521	9.77e-07	1.06e-29	2.09e-61	0.257175	2.15e-14	6.74e-144	1.59e-186	3.66e-205
GO_NUCLEAR_MEMBRANE	0.882562	0.999887	1.18e-11	4.16e-221	2.06e-287	2.1e-267	0	2.75e-07	0.00027933	2.07e-13	6.68e-35	2.05e-06	5.83e-18	5.87e-94	9.06e-124	7.31e-131
GO_NUCLEAR_PERIPHERY	1.36e-20	0.483889	3.09e-48	4.41e-300	0	0	0	3.88e-15	0.0593136	5.19e-27	1.37e-72	4.5e-25	1.67e-36	4.34e-110	1.13e-112	1.1e-208
GO_NUCLEOSIDE_PHOSPHATE_BIOSYNTHETIC_PROCESS	0.000268247	0.534116	9.1e-37	3.74e-222	0	6.03e-274	0	0.000223832	0.089701	2.04e-23	3.07e-61	0.028093	2.09e-13	3.28e-112	2.26e-131	2.29e-180
GO_ORGANELLE_ASSEMBLY	0.977309	0.853567	4.45e-17	5.78e-205	0	2.8e-291	0	0.0411935	0.0137803	1.05e-15	2.8e-34	3.98e-05	3.77e-20	1.87e-123	8.12e-151	1.52e-196
GO_ORGANELLE_FISSION	0.99856	1	4.36e-111	3.13e-175	0	0	0	0.077603	0.412028	4.73e-30	2.13e-134	0.00402065	9.11e-57	3.33e-94	2.66e-146	1.3e-238
GO_ORGANELLE_LOCALIZATION	1	0.454	1.06e-15	5.01e-221	0	3.93e-276	0	1.84e-05	1.4e-11	2.79e-27	7.93e-46	0.0712675	6.06e-17	6.01e-106	1.1e-162	3.73e-176
GO_ORGANIC_ACID_BIOSYNTHETIC_PROCESS	1	1.19e-08	3.79e-39	2.39e-215	0	1.44e-214	0	9.09e-07	5.71e-29	3.54e-21	2.37e-40	1	6.02e-12	2.21e-72	2.3e-123	3.51e-102
GO_ORGANIC_ACID_CATABOLIC_PROCESS	0.11756	0.782319	3.66e-28	2.44e-271	0	9.32e-280	0	2.41e-31	1.22e-26	2.48e-10	3.39e-36	2.46e-07	5.35e-22	1.78e-80	1.99e-96	1.4e-105
GO_ORGANIC_ACID_TRANSMEMBRANE_TRANSPORTER_ACTIVITY	8.69e-97	0.986674	0.999385	0	2.27e-201	0	0	5.74e-121	2.27e-35	6.93e-06	6.27e-08	5.63e-21	1	1.73e-134	3.83e-119	6.91e-29
GO_ORGANIC_ACID_TRANSPORT	2.03e-38	0.735661	0.00180866	0	1.41e-261	0	0	2.05e-69	1.06e-31	8.5e-10	6.52e-18	1.55e-14	0.116485	2.41e-115	3.84e-120	2.5e-53
GO_ORGANIC_ANION_TRANSMEMBRANE_TRANSPORTER_ACTIVITY	1.46e-76	0.999906	0.759914	0	5.2e-208	0	0	5.78e-93	2.21e-23	7.1e-06	2.47e-11	5.23e-16	0.99951	1.24e-124	1.5e-117	6.6e-35
GO_ORGANIC_ANION_TRANSPORT	1.09e-19	0.971474	0.0223099	0	2.87e-248	0	0	7.54e-49	1.6e-22	3.76e-10	1.59e-18	3.64e-14	0.000671707	1.65e-117	2.98e-126	5.62e-76
GO_ORGANIC_CYCLIC_COMPOUND_CATABOLIC_PROCESS	1.21e-23	1	0.486232	0	7.73e-137	1.73e-274	0	9.57e-78	6.04e-29	0.935794	0.00273207	8.43e-24	2.37e-09	4.68e-149	1.01e-75	5.68e-70
GO_OSSIFICATION	0.310291	0.893704	3.18e-13	5.5e-298	1.01e-262	7.7e-274	0	5.23e-20	2.81e-17	0.00163537	2.33e-15	3.36e-05	7.04e-14	9.68e-126	1.35e-133	1.71e-134
GO_PALLIUM_DEVELOPMENT	0.999839	0.437884	1.35e-43	4.07e-167	0	2.44e-306	0	0.00396642	1.15e-05	1.36e-52	3.55e-93	0.00430584	1.58e-25	9.09e-35	7.34e-116	2.41e-128
GO_PASSIVE_TRANSMEMBRANE_TRANSPORTER_ACTIVITY	3.02e-22	1	0.0185322	1.52e-226	1.11e-141	0	0	3.65e-33	0.687977	0.99999	1.34e-06	1.47e-22	1.47e-07	5.42e-181	1.03e-131	2.04e-158
GO_PEPTIDASE_INHIBITOR_ACTIVITY	1	4.22e-38	0.146863	1.54e-305	0	3.47e-188	0	2.26e-06	9.65e-52	6.17e-30	1.43e-07	0.00139346	1.38e-15	2.22e-75	4.33e-99	4.98e-73
GO_PEPTIDASE_REGULATOR_ACTIVITY	0.999987	1.95e-21	0.0951351	1.15e-305	7.06e-287	3.13e-202	0	8.58e-13	2.49e-40	6.27e-15	0.000336794	0.000115619	3.59e-12	8.67e-81	7.16e-89	3.06e-67
GO_PEPTIDYL_LYSINE_MODIFICATION	1	4.93e-30	0.7359	8.2e-271	0	1.35e-157	0	6.88e-05	1.74e-27	1.61e-45	1.04e-13	0.260019	0.000694387	6.69e-119	1.64e-153	1.86e-127
GO_PEPTIDYL_SERINE_MODIFICATION	5.83e-14	1.75e-28	0.13308	0	0	3.13e-245	0	7.94e-32	8.33e-43	1.05e-48	1.28e-22	2.82e-10	0.00347164	8.43e-123	1.12e-171	1.36e-118
GO_PLACENTA_DEVELOPMENT	1	1.63e-28	0.819024	2.83e-271	0	1.18e-150	0	0.00023525	7.34e-38	8.97e-52	3.02e-27	0.99267	0.123452	1.23e-44	3.3e-140	1.53e-75
GO_POSITIVE_REGULATION_OF_APOPTOTIC_SIGNALING_PATHWAY	1	2.51e-15	2.08e-15	8.5e-255	0	8.03e-215	0	0.102095	1.38e-22	4.14e-67	2.92e-77	0.799147	4.65e-15	7.77e-89	2.98e-203	3.65e-208
GO_POSITIVE_REGULATION_OF_CELL_CYCLE_PROCESS	0.182873	0.0221559	2.06e-87	7.8e-292	0	0	0	4.85e-15	2.12e-17	4.05e-17	1.29e-66	1.11e-10	1.39e-58	8.53e-92	1.38e-98	7.25e-151
GO_POSITIVE_REGULATION_OF_CELL_CYCLE	0.288669	0.938369	2.1e-84	1.26e-254	0	0	0	5.57e-14	8.48e-11	6.33e-15	2.56e-70	0.0222555	6.78e-37	2.61e-89	3.5e-141	1.27e-152
GO_POSITIVE_REGULATION_OF_CELL_DIVISION	4.54e-21	1	3.68e-79	1.4e-307	0	0	0	2.13e-36	1.51e-07	2.83e-24	1.15e-96	1.12e-25	1.1e-50	6.83e-135	4.23e-177	1.38e-257
GO_POSITIVE_REGULATION_OF_CELLULAR_PROTEIN_LOCALIZATION	1	9.44e-22	2.37e-16	1.91e-303	0	1.07e-221	0	6.38e-09	8.72e-38	1.13e-35	1.7e-33	0.504693	5.65e-14	9.49e-138	1.47e-187	5.33e-163
GO_POSITIVE_REGULATION_OF_CHROMOSOME_ORGANIZATION	1	9.53e-23	4.16e-25	1.12e-238	0	7.57e-209	0	0.846704	1.56e-10	7.66e-122	1.33e-136	0.644403	1.66e-11	7.54e-10	1.1e-118	9.71e-157
GO_POSITIVE_REGULATION_OF_ERK1_AND_ERK2_CASCADE	6.14e-53	1	1	0	4.16e-123	0	0	6.37e-91	3.55e-20	0.996638	0.37755	2.04e-54	1.04e-09	1.13e-219	4.88e-151	2.73e-74
GO_POSITIVE_REGULATION_OF_ESTABLISHMENT_OF_PROTEIN_LOCALIZATION	0.999983	2.45e-11	0.492801	0	7.09e-304	6.27e-189	0	2.78e-20	5.26e-46	3.09e-18	1.04e-08	0.856011	0.185336	5.62e-175	3.3e-190	2.31e-135
GO_POSITIVE_REGULATION_OF_GROWTH	0.964866	0.477298	1.75e-19	2.95e-235	0	5.45e-286	0	0.00138514	5.42e-06	9.14e-14	8.2e-32	0.00588345	1.15e-15	3.82e-129	1.85e-163	5.43e-181
GO_POSITIVE_REGULATION_OF_HEMOPOIESIS	2.22e-23	2.3e-07	0.282682	0	1.09e-237	2.64e-301	0	1.09e-147	3.96e-131	4.06e-05	0.038352	2.47e-11	0.0597567	2.02e-183	8.24e-186	8.54e-27
GO_POSITIVE_REGULATION_OF_INTRACELLULAR_PROTEIN_TRANSPORT	0.999999	1.3e-37	0.00374682	0	0	8.34e-179	0	2.4e-28	1.42e-76	2.9e-37	8.84e-15	0.914976	0.00385353	1.03e-147	1.25e-209	7.17e-145
GO_POSITIVE_REGULATION_OF_MITOTIC_CELL_CYCLE	1.36e-05	0.905031	4.1e-126	6.86e-283	0	0	0	6.19e-26	3e-18	1.91e-11	2.46e-76	5.4e-09	5.28e-60	7.12e-160	3.4e-147	6.2e-185
GO_POSITIVE_REGULATION_OF_NUCLEOCYTOPLASMIC_TRANSPORT	1	1.88e-61	1.93e-06	0	0	1.32e-181	0	1.17e-38	4.12e-109	2.39e-40	1.41e-14	0.728289	9.29e-08	1.56e-266	0	1.33e-270
GO_POSITIVE_REGULATION_OF_PROTEIN_LOCALIZATION_TO_NUCLEUS	1	2.23e-52	0.00102019	0	0	8.42e-175	0	5.74e-29	7.41e-95	6.34e-38	1.2e-11	0.685973	6.54e-11	2.08e-186	1.11e-243	3.66e-183
GO_POSITIVE_REGULATION_OF_SEQUENCE_SPECIFIC_DNA_BINDING_TRANSCRIPTION_FACTOR_ACTIVITY	0.999999	6.12e-19	1	0	6e-266	2.63e-128	0	2.9e-12	4.29e-43	3.39e-26	0.00135333	0.991014	0.999968	2.54e-133	1.03e-225	3.66e-124
GO_POSITIVE_REGULATION_OF_STRESS_ACTIVATED_PROTEIN_KINASE_SIGNALING_CASCADE	0.128966	5.81e-90	1	0	0	6.84e-126	0	0.438644	1.52e-27	1.42e-82	0.0340073	4.79e-12	0.995902	4.92e-137	6.76e-164	9.97e-154
GO_POSITIVE_REGULATION_OF_TRANSCRIPTION_FROM_RNA_POLYMERASE_II_PROMOTER	2.92e-21	4.58e-15	0.992461	0	1.82e-280	3.26e-237	0	2.89e-32	7.11e-27	2.75e-26	2.06e-09	2.77e-06	0.970235	1.51e-107	6.93e-165	1.26e-101
GO_POSTSYNAPSE	8.02e-43	1	1	0	5.43e-76	6.72e-248	0	7.39e-76	2.89e-23	0.993561	1	2.1e-30	0.999307	2.96e-214	1.27e-114	6.28e-107
GO_POSTSYNAPTIC_MEMBRANE	6.92e-22	1	1	0	2.12e-38	3.44e-224	0	3.52e-55	7.95e-20	0.999995	1	4.02e-41	0.886067	4.21e-190	6.47e-90	7.76e-108
GO_POTASSIUM_ION_TRANSPORT	1.07e-39	1	1.28e-13	9.7e-193	4.84e-138	0	0	5.85e-40	0.999839	1	1.96e-11	2.4e-66	6.44e-44	1.15e-249	1.75e-100	6.6e-185
GO_PROTEASOMAL_PROTEIN_CATABOLIC_PROCESS	0.999997	1.05e-27	0.107786	1.87e-289	0	2.63e-163	0	0.00137623	4.01e-30	4.78e-68	4.65e-33	1	0.939738	1.57e-100	3.18e-207	1.4e-117
GO_PROTEIN_CATABOLIC_PROCESS	0.681514	1.04e-11	0.99533	9.93e-299	0	2.29e-164	0	1.71e-09	2.68e-22	4.68e-37	8.53e-18	0.876508	0.987896	4.51e-111	4.09e-187	3.45e-108
GO_PROTEIN_DNA_COMPLEX_SUBUNIT_ORGANIZATION	0.993185	1	6.93e-31	9.54e-197	0	0	0	0.000190436	0.0514417	1.12e-32	1.24e-85	1.61e-11	4.11e-35	1.65e-135	3.72e-157	7.66e-241
GO_PROTEIN_FOLDING	0.26632	3.98e-14	1	0	1.63e-179	1.21e-120	0	3.98e-49	1.59e-78	1.45e-11	0.390622	0.954291	1	2.97e-117	8.46e-156	2.24e-32
GO_PROTEIN_HOMODIMERIZATION_ACTIVITY	0.253235	0.99481	6.68e-14	1.16e-219	5.05e-294	7.09e-264	0	5.04e-08	0.000171046	4.1e-09	8.45e-26	0.000446916	1e-11	3.93e-142	4.97e-117	4.39e-153
GO_PROTEIN_MODIFICATION_BY_SMALL_PROTEIN_CONJUGATION_OR_REMOVAL	0.206014	9.01e-17	0.98181	3.43e-286	0	2.42e-174	0	2.56e-06	4.87e-16	1.78e-39	3.67e-18	0.219227	0.786163	7.8e-95	3.06e-149	4.5e-101
GO_PROTEIN_POLYUBIQUITINATION	1	1.19e-12	0.618214	1.38e-257	0	2.42e-120	0	0.00888418	2.26e-17	5.37e-71	2.48e-49	0.999903	0.967807	9.88e-49	3.39e-164	1.02e-107
GO_PROTEIN_STABILIZATION	2.5e-06	1.68e-11	0.365975	0	0	4.99e-210	0	4.68e-33	2.47e-38	1.79e-39	3.45e-22	0.106773	0.979948	1.55e-71	4.83e-162	1.12e-71
GO_PROTEIN_UBIQUITINATION	0.216779	4.07e-14	0.504563	6.84e-281	0	5.22e-180	0	1.65e-06	1.2e-14	2.49e-40	2.27e-24	0.663108	0.83526	8.73e-93	9.15e-151	2.67e-106
GO_PROTEINACEOUS_EXTRACELLULAR_MATRIX	4.11e-07	1	1.18e-13	1.76e-258	3.17e-202	0	0	1.54e-29	0.0025116	0.925037	3.56e-15	5.57e-24	6.81e-34	1.7e-214	1.48e-161	2.66e-201
GO_RAS_GUANYL_NUCLEOTIDE_EXCHANGE_FACTOR_ACTIVITY	4.72e-44	1	0.000500225	1.56e-307	4.79e-192	0	0	3.57e-46	0.00449142	0.838669	4.06e-08	1.04e-26	5.74e-07	2.06e-208	3.14e-153	1.02e-136
GO_RAS_PROTEIN_SIGNAL_TRANSDUCTION	0.0855165	5.47e-44	0.990373	0	0	1.06e-131	0	6.24e-25	1.65e-54	4.24e-87	2.77e-32	0.999999	1	1.97e-119	1.66e-245	1.38e-138
GO_RECEPTOR_COMPLEX	4.01e-15	1	1	4.22e-269	1.22e-174	2.03e-249	0	2.27e-23	0.00465122	1.57e-05	2.49e-05	1.66e-16	0.589016	7.51e-184	5.32e-209	5.95e-179
GO_REGULATION_OF_AUTOPHAGY	1	1.13e-26	0.999988	8.78e-268	1.25e-294	7.39e-98	0	1.23e-07	4.72e-37	1.62e-46	7.27e-16	1	1	1.7e-94	1.26e-185	2.34e-107
GO_REGULATION_OF_BINDING	0.00207537	3.74e-48	0.821011	0	0	1.09e-210	0	8.61e-20	6e-55	4.57e-52	9.47e-15	0.370341	0.962639	4.63e-119	1.48e-246	4.58e-137
GO_REGULATION_OF_BLOOD_CIRCULATION	1.11e-20	1	0.658022	8.15e-306	2.38e-183	0	0	5.27e-42	1.87e-08	0.0289226	1.68e-07	4.93e-20	4.11e-06	1.75e-172	5.04e-152	1.18e-145
GO_REGULATION_OF_BODY_FLUID_LEVELS	4.82e-12	1	0.99471	3.4e-243	1.98e-176	1.82e-285	0	8.11e-17	0.0173524	0.00263287	1.07e-06	1.46e-18	2.7e-05	2.7e-167	8.76e-113	8.37e-114
GO_REGULATION_OF_CALCIUM_ION_TRANSPORT	1.31e-16	1	0.971677	0	2.6e-163	8.09e-297	0	2.46e-40	4.16e-07	0.390091	0.000337099	1.77e-28	1.01e-11	2.56e-172	3.26e-101	1.27e-132
GO_REGULATION_OF_CANONICAL_WNT_SIGNALING_PATHWAY	0.000140491	7.5e-21	4.62e-12	0	0	2.2e-245	0	4.2e-15	4.31e-24	2.35e-21	6.01e-18	2.66e-06	1.92e-09	5.61e-116	4.61e-103	1.1e-98
GO_REGULATION_OF_CATION_TRANSMEMBRANE_TRANSPORT	3.22e-25	1	0.146402	5.31e-291	6.66e-186	0	0	1.72e-35	0.000246675	0.00777933	3.73e-11	5.93e-32	3.29e-12	1.79e-150	3.85e-112	6.74e-136
GO_REGULATION_OF_CELL_CYCLE_G1_S_PHASE_TRANSITION	0.999904	0.999574	8.9e-39	2.75e-215	1.16e-304	3.28e-274	0	2.94e-14	6.63e-15	5.89e-11	1.66e-46	0.674892	5.54e-18	2.7e-91	3.73e-146	1.01e-115
GO_REGULATION_OF_CELL_CYCLE_PHASE_TRANSITION	0.760892	1	4.92e-73	8.99e-219	0	0	0	2.88e-11	8.08e-06	1.65e-10	1.73e-67	0.0466508	3.9e-32	2.36e-114	5.49e-164	1.5e-214
GO_REGULATION_OF_CELL_CYCLE_PROCESS	0.95544	0.962342	6.62e-84	2.87e-220	0	0	0	0.00152388	0.00107207	7.49e-22	2.21e-86	0.00448216	8.71e-46	1.14e-95	2.14e-153	8.25e-216
GO_REGULATION_OF_CELL_CYCLE	0.998463	0.996068	2.41e-56	2.59e-201	0	0	0	0.0053962	0.00334583	3.74e-13	1.17e-59	0.0216839	8.97e-33	2.7e-131	4.87e-157	4.24e-201
GO_REGULATION_OF_CELL_DIVISION	7.3e-06	1	3.3e-120	1.83e-199	0	0	0	2.53e-09	0.999188	3.9e-12	2.35e-128	2.66e-23	3.69e-88	3.93e-146	2.55e-152	0
GO_REGULATION_OF_CELL_MORPHOGENESIS_INVOLVED_IN_DIFFERENTIATION	0.999994	5.01e-20	2.15e-11	0	0	1.94e-183	0	5.45e-18	1.42e-48	1.82e-35	1.11e-31	0.999986	0.0300093	5.03e-84	3.27e-181	3.25e-75
GO_REGULATION_OF_CELL_PROJECTION_ASSEMBLY	1.53e-28	0.877847	0.03914	0	5.97e-298	5.48e-304	0	1.85e-36	6.99e-10	6.29e-18	3.15e-24	1.56e-19	4.08e-05	3.61e-147	1.28e-133	2.02e-145
GO_REGULATION_OF_CELLULAR_PROTEIN_LOCALIZATION	0.999997	1.11e-35	1.74e-09	0	0	1.07e-210	0	4.59e-07	1.26e-39	1.25e-32	2.7e-19	0.652432	1.19e-06	8.47e-140	1.85e-194	3.27e-167
GO_REGULATION_OF_CELLULAR_RESPONSE_TO_GROWTH_FACTOR_STIMULUS	8.57e-40	0.999997	4.41e-32	0	3.5e-261	0	0	1.46e-49	6.14e-11	5.98e-05	1.25e-30	1.48e-43	9.66e-44	2.74e-133	1.17e-64	1.07e-100
GO_REGULATION_OF_CELLULAR_RESPONSE_TO_STRESS	0.999377	3.25e-20	1	9.61e-263	6.85e-300	1.38e-141	0	0.00601821	1.3e-17	2.43e-36	6.05e-10	0.722816	0.922307	6.21e-110	2.54e-177	1.23e-135
GO_REGULATION_OF_CHROMATIN_ORGANIZATION	0.755641	5.88e-61	0.0882723	0	0	1.46e-212	0	0.415148	7.61e-26	4.47e-100	4.68e-59	4.4e-12	1.96e-13	1.73e-41	1.09e-74	6.74e-100
GO_REGULATION_OF_CHROMOSOME_ORGANIZATION	0.0862609	0.00047985	1.1e-26	2.56e-274	0	0	0	6.06e-05	1.26e-07	2e-36	2.58e-61	3.93e-10	3.26e-25	4.48e-104	6.53e-121	1.65e-175
GO_REGULATION_OF_CYSTEINE_TYPE_ENDOPEPTIDASE_ACTIVITY	0.999085	2.73e-26	0.116042	0	0	7.5e-171	0	2.4e-10	2.06e-36	6.34e-40	1.33e-21	0.241684	0.00376313	5.16e-73	1.24e-162	1.71e-118
GO_REGULATION_OF_CYTOKINE_PRODUCTION	1.16e-12	0.00405246	1	0	5.72e-195	1.61e-233	0	2.05e-34	4.29e-24	3.51e-05	0.600758	3.34e-12	0.521724	4.05e-183	1.37e-143	1.13e-76
GO_REGULATION_OF_CYTOSKELETON_ORGANIZATION	0.952691	0.150574	1.78e-21	1.26e-227	0	0	0	0.0138483	8.44e-05	6.65e-20	1.74e-42	0.000733493	3.81e-20	3.22e-124	6.31e-145	2.91e-177
GO_REGULATION_OF_CYTOSOLIC_CALCIUM_ION_CONCENTRATION	3.86e-18	1	1	1.11e-263	6.33e-101	2.49e-217	0	2.89e-48	5.87e-10	0.0180105	0.216521	6.26e-23	0.73575	1.48e-121	7.72e-118	3.15e-68
GO_REGULATION_OF_DNA_METABOLIC_PROCESS	0.734553	1	9.25e-52	8.63e-216	0	0	0	6.8e-06	0.0123605	6.05e-32	4.13e-97	0.635763	6.59e-18	5.46e-136	7.9e-203	1.76e-234
GO_REGULATION_OF_DNA_REPLICATION	1	1	1.14e-57	4.97e-153	0	4.43e-288	0	0.759987	0.0323969	1.3e-50	1.63e-132	1	3.48e-25	1.35e-105	2.99e-219	7.15e-272
GO_REGULATION_OF_ENDOCYTOSIS	0.000419472	7.68e-29	1	0	1.71e-274	7.73e-157	0	4.9e-44	1.09e-67	1.52e-55	4.8e-11	0.00829861	0.999966	2.02e-70	1.76e-178	2.39e-54
GO_REGULATION_OF_EPITHELIAL_CELL_MIGRATION	1.17e-45	1	5.13e-09	1.79e-263	4.55e-179	2.35e-308	0	6.07e-32	0.904652	0.000146568	1.58e-25	2.28e-29	7.08e-15	3.16e-91	1.13e-50	3.77e-105
GO_REGULATION_OF_ERK1_AND_ERK2_CASCADE	2.73e-36	1	0.900974	1.11e-266	3.45e-144	0	0	4.11e-47	0.0290445	0.998204	0.00020576	7.64e-49	4.71e-14	1.26e-207	1.83e-146	6.8e-171
GO_REGULATION_OF_EXTRINSIC_APOPTOTIC_SIGNALING_PATHWAY	1	6.86e-15	0.780986	2.03e-229	0	6.57e-174	0	0.020254	1.7e-17	7.59e-73	1.16e-50	0.115617	0.000473663	5.64e-48	3.35e-174	3.04e-139
GO_REGULATION_OF_GENE_EXPRESSION_EPIGENETIC	0.992414	8.34e-99	1	0	0	1.65e-107	0	0.186569	1.12e-36	3.76e-128	8.9e-25	0.76514	0.999891	6.53e-41	4.66e-162	1.88e-91
GO_REGULATION_OF_HEART_CONTRACTION	2.06e-15	1	0.284335	2.25e-256	5.45e-182	0	0	1.93e-23	0.0185605	0.0225879	1.75e-09	1.87e-26	8.79e-14	3.17e-162	4.1e-132	6.26e-162
GO_REGULATION_OF_HEMOPOIESIS	4.71e-28	0.00179454	0.994421	0	2.86e-199	1.88e-304	0	2.46e-75	2.75e-57	0.0109401	0.78908	8.39e-16	0.31484	3.25e-196	7.6e-164	2.82e-62
GO_REGULATION_OF_INTRACELLULAR_PROTEIN_TRANSPORT	1	1.25e-42	0.93633	0	0	1.31e-128	0	1.31e-15	7.53e-76	5.25e-33	3.25e-05	0.999866	0.911458	1.94e-139	1.47e-208	2.43e-134
GO_REGULATION_OF_ION_HOMEOSTASIS	3.61e-13	1	0.999992	1.85e-274	2.79e-123	1.44e-286	0	1.89e-34	8.55e-05	0.937253	0.220813	1.27e-31	1.24e-12	8.11e-150	3.49e-80	1.31e-89
GO_REGULATION_OF_JNK_CASCADE	0.266152	1.77e-88	1	0	0	3.64e-143	0	0.0502599	9.33e-38	2.37e-69	0.121392	2.12e-05	0.884189	1.74e-122	9.57e-155	7.76e-131
GO_REGULATION_OF_LEUKOCYTE_DIFFERENTIATION	1.86e-42	0.0149789	0.999203	0	8.15e-195	0	0	2.01e-94	5.56e-65	0.0861816	0.978209	1.79e-27	0.129474	5.65e-221	3.07e-171	1.28e-65
GO_REGULATION_OF_LIGASE_ACTIVITY	0.478064	1	4.51e-39	3.02e-243	1.08e-294	9.07e-292	0	5.47e-19	6.09e-11	0.0224962	7.68e-33	1.21e-05	8.03e-21	2.13e-196	2.74e-134	4.21e-180
GO_REGULATION_OF_LIPID_BIOSYNTHETIC_PROCESS	0.975578	3.94e-21	1	0	3.26e-204	3.94e-87	0	1.09e-28	1.62e-59	7.83e-33	0.481817	0.958	1	3.63e-140	6.59e-213	6.03e-106
GO_REGULATION_OF_LYMPHOCYTE_DIFFERENTIATION	7.8e-52	2.56e-06	0.767368	0	4.05e-255	0	0	9.58e-123	6.63e-84	0.00704154	0.911471	2.03e-29	0.0857444	1.32e-272	1.95e-225	1.58e-51
GO_REGULATION_OF_MICROTUBULE_BASED_PROCESS	1	0.611321	2.67e-150	1.35e-148	0	0	0	0.999623	0.329792	1.8e-27	1.59e-118	1.57e-06	1.73e-105	2.03e-62	1.61e-108	6.42e-244
GO_REGULATION_OF_MICROTUBULE_POLYMERIZATION_OR_DEPOLYMERIZATION	1	0.483465	9.99e-135	3.44e-110	0	0	0	1	0.815742	1.43e-31	4.79e-119	3.03e-10	7.26e-129	3.32e-78	1.01e-141	4.45e-298
GO_REGULATION_OF_MITOTIC_CELL_CYCLE	1	0.997786	1.63e-66	6.96e-199	0	0	0	0.0099821	2.78e-05	1.89e-25	5.32e-88	0.724409	3.49e-32	7.92e-94	1.48e-174	7.9e-215
GO_REGULATION_OF_MYELOID_CELL_DIFFERENTIATION	5.11e-26	0.924844	0.991357	0	3.04e-164	2.52e-302	0	1.69e-69	1.45e-41	0.00239682	0.0107248	2.71e-25	0.000118674	2.72e-119	9.97e-108	6.86e-57
GO_REGULATION_OF_NEURON_APOPTOTIC_PROCESS	0.0161886	0.00168441	3.56e-18	0	3.3e-300	1.11e-291	0	1.67e-26	2.3e-27	4.78e-36	1.53e-45	0.00115475	6.08e-14	3.78e-62	3.67e-158	2.39e-113
GO_REGULATION_OF_NEUROTRANSMITTER_LEVELS	1.33e-07	1	3.08e-19	2.94e-244	2.57e-209	0	0	2.75e-42	1.53e-13	0.239163	1.7e-18	6.92e-39	8.21e-49	2.12e-143	4.77e-80	2.84e-101
GO_REGULATION_OF_NUCLEAR_DIVISION	0.965532	1	6.87e-143	1.04e-172	0	0	0	0.0150604	0.99576	3.89e-31	1.78e-177	0.00116599	1.38e-68	5.56e-122	1.25e-163	0
GO_REGULATION_OF_NUCLEOCYTOPLASMIC_TRANSPORT	1	1.58e-50	0.994349	0	0	4.78e-117	0	1.98e-18	5.03e-88	2.04e-33	0.0159888	0.999881	0.913541	1.48e-148	8.47e-222	6.09e-131
GO_REGULATION_OF_ORGAN_MORPHOGENESIS	1.27e-19	0.727474	9.25e-17	9.57e-254	2.27e-302	3.92e-296	0	2.73e-12	0.0286322	1.44e-12	6e-30	1.63e-11	8.76e-12	4.43e-130	7.22e-126	2.72e-140
GO_REGULATION_OF_OSSIFICATION	4.21e-06	1.47e-14	3.82e-21	0	0	0	0	2.22e-27	2.92e-38	3.68e-10	2.61e-11	6.06e-26	3.99e-38	8.75e-153	6.39e-87	2.36e-105
GO_REGULATION_OF_PEPTIDASE_ACTIVITY	1	1.12e-22	0.311248	4.99e-301	1.44e-305	3.56e-164	0	2.54e-06	1.99e-37	4.37e-24	2.41e-09	0.408392	3.45e-05	2.38e-83	1.91e-140	5.01e-109
GO_REGULATION_OF_PHOSPHATIDYLINOSITOL_3_KINASE_SIGNALING	3.28e-12	1	0.90845	7.53e-195	5.54e-144	4.29e-227	0	1.85e-33	2.35e-05	0.992378	0.000593159	3.44e-12	0.0124764	6.08e-121	9.85e-94	2.92e-43
GO_REGULATION_OF_PROTEIN_BINDING	0.980321	1e-47	1	0	0	1.48e-137	0	1.81e-09	9.84e-47	8.94e-87	2.69e-32	0.991174	0.999979	1.53e-45	1.94e-234	1.73e-106
GO_REGULATION_OF_PROTEIN_COMPLEX_ASSEMBLY	1	3.83e-15	0.987476	0	0	4.66e-129	0	4.43e-24	5.74e-60	1.2e-34	3.46e-18	0.984104	0.927	1.56e-109	2.45e-166	1.38e-75
GO_REGULATION_OF_PROTEIN_COMPLEX_DISASSEMBLY	1	0.980518	1.16e-66	2.29e-142	0	0	0	0.994955	0.818289	2.15e-21	1.96e-75	1.36e-27	1.28e-100	3.87e-94	7.62e-131	2.15e-268
GO_REGULATION_OF_PROTEIN_IMPORT	0.999945	1.02e-33	1	0	9.95e-305	1.78e-118	0	1.11e-43	7.03e-95	8.9e-28	0.187076	0.997689	0.999867	1.5e-180	2.53e-242	9.9e-142
GO_REGULATION_OF_PROTEIN_LOCALIZATION_TO_NUCLEUS	1	3.64e-47	0.902441	0	0	1.22e-137	0	1.76e-33	6.02e-93	2.26e-27	0.0608256	0.995696	0.512375	9.96e-160	2.24e-225	2.74e-139
GO_REGULATION_OF_PROTEIN_STABILITY	0.999876	2.44e-15	0.00737482	7.25e-295	0	9.87e-178	0	8.76e-09	6.49e-27	2.05e-41	1.22e-25	0.992371	0.0844322	2.1e-74	6.19e-180	1.64e-139
GO_REGULATION_OF_PROTEIN_TARGETING	0.999998	3.86e-23	0.985394	0	0	2.25e-138	0	2.22e-18	1.75e-55	7.6e-28	3.24e-06	0.998563	0.962356	3.65e-139	8.59e-200	1.82e-135
GO_REGULATION_OF_RESPONSE_TO_BIOTIC_STIMULUS	3.68e-16	0.89766	1	1.94e-261	2.78e-187	2.19e-268	0	9.41e-17	8.58e-06	1.31e-08	0.00931148	2.75e-26	0.00792856	1.47e-108	2.22e-84	1.26e-96
GO_REGULATION_OF_RESPONSE_TO_DNA_DAMAGE_STIMULUS	0.999622	1.5e-13	2.85e-11	3.83e-187	0	1.23e-266	0	0.999993	0.0853846	9.68e-33	9.94e-33	6.8e-06	1.8e-19	9.18e-146	3.45e-183	1.53e-201
GO_REGULATION_OF_RESPONSE_TO_EXTRACELLULAR_STIMULUS	0.999683	3.44e-14	1	2.88e-256	2.66e-225	4.15e-66	0	2.21e-11	5.78e-34	9.87e-32	0.000342327	1	1	1.42e-90	1.01e-170	1.3e-89
GO_REGULATION_OF_SEQUENCE_SPECIFIC_DNA_BINDING_TRANSCRIPTION_FACTOR_ACTIVITY	0.753584	8.82e-23	1	0	2.29e-278	3.59e-142	0	6.82e-16	4.6e-39	1.89e-26	0.00391227	0.708886	0.999909	5.23e-123	5.06e-209	1.89e-114
GO_REGULATION_OF_SIGNAL_TRANSDUCTION_BY_P53_CLASS_MEDIATOR	1	8.25e-11	4.5e-16	1.31e-199	0	5.87e-244	0	0.989956	1.41e-10	6.94e-33	9.22e-45	2.5e-09	5.72e-45	2.71e-108	2.47e-83	8.46e-167
GO_REGULATION_OF_STAT_CASCADE	8.85e-38	0.0029392	1	0	1.04e-177	1.44e-296	0	4.49e-44	2.96e-21	5.71e-09	0.99681	2e-29	0.984019	2.81e-250	1.91e-212	7.21e-97
GO_REGULATION_OF_STRESS_ACTIVATED_PROTEIN_KINASE_SIGNALING_CASCADE	0.485448	3.26e-61	1	0	0	1.5e-173	0	0.456355	2.24e-19	1.39e-72	6.53e-09	2.36e-08	0.0216444	5.53e-128	1.61e-153	3.87e-163
GO_REGULATION_OF_SYSTEM_PROCESS	2.94e-22	1	0.925872	2.62e-303	3.12e-190	2.55e-284	0	6.12e-38	1.35e-08	9.77e-06	8.15e-10	3.11e-12	0.0844034	5.64e-148	6.25e-139	2.83e-124
GO_REGULATION_OF_TRANSMEMBRANE_RECEPTOR_PROTEIN_SERINE_THREONINE_KINASE_SIGNALING_PATHWAY	1.06e-10	0.00520214	5.01e-25	0	0	0	0	8.17e-29	4.41e-23	2.13e-15	3.85e-28	1.39e-25	1.38e-43	1.52e-114	1.3e-72	1.79e-100
GO_REGULATION_OF_TRANSMEMBRANE_TRANSPORT	2.22e-16	1	3.32e-06	1.04e-249	1.18e-175	0	0	4.13e-35	0.00276415	0.992186	6.58e-09	2.76e-27	1.03e-18	1.58e-169	4.03e-98	4.3e-133
GO_REGULATION_OF_TRANSPORTER_ACTIVITY	1.85e-23	1	4.63e-07	2.62e-282	2.77e-198	0	0	3.87e-34	0.000170244	0.0401092	2.91e-13	1.13e-34	9.32e-22	1.02e-125	1.82e-70	3.32e-117
GO_REGULATORY_REGION_NUCLEIC_ACID_BINDING	2.41e-25	5.47e-16	0.99364	0	1.99e-286	2.24e-263	0	3.74e-26	1.18e-19	3.85e-22	5.29e-06	3.03e-10	0.917843	1.41e-137	1.54e-173	5.29e-108
GO_RESPIRATORY_SYSTEM_DEVELOPMENT	5.19e-39	0.958739	1.08e-09	0	6.88e-213	0	0	1.93e-52	6.55e-14	0.927305	0.0130104	5.86e-33	5.34e-20	1.15e-176	2.63e-113	3.42e-117
GO_RESPONSE_TO_ALCOHOL	1.09e-18	0.996453	1.71e-16	0	2.93e-282	0	0	2.32e-31	1.03e-08	0.00077088	2.63e-18	1.36e-14	3.39e-13	1.12e-199	1.4e-199	1.55e-200
GO_RESPONSE_TO_CARBOHYDRATE	0.999999	1.88e-26	1	0	5.18e-242	1.22e-139	0	3.34e-12	1.58e-47	5.4e-24	0.092289	0.229473	0.764073	1.02e-98	2.69e-153	9.27e-85
GO_RESPONSE_TO_DRUG	0.752822	0.892903	3.58e-28	4.72e-243	0	0	0	8.48e-08	3.08e-07	6.99e-12	7.98e-40	0.0218469	3.65e-19	3.11e-137	1.18e-199	1.97e-199
GO_RESPONSE_TO_ENDOPLASMIC_RETICULUM_STRESS	1	4.93e-26	0.955317	2.09e-250	0	9.12e-112	0	0.2869	5.92e-37	9.55e-83	4.31e-41	1	0.968289	4.47e-71	6.19e-180	1.69e-91
GO_RESPONSE_TO_INSULIN	1	1.63e-12	0.999924	1.24e-252	7.23e-305	1.84e-133	0	0.00258598	1.31e-18	6.76e-32	4.43e-12	0.999996	0.997322	2.68e-108	7.34e-184	1.26e-129
GO_RESPONSE_TO_IONIZING_RADIATION	0.966604	0.0997611	4.5e-59	4.49e-237	0	4.39e-307	0	6.95e-12	8.86e-15	5.82e-25	2.8e-69	0.0153538	4.52e-31	1.84e-130	3.84e-143	2.35e-168
GO_RESPONSE_TO_KETONE	0.0023374	1	3.33e-44	2.58e-193	0	0	0	2.08e-09	0.330636	1.35e-14	2.37e-68	3.07e-28	1.28e-54	6.76e-103	1.85e-73	4.01e-186
GO_RESPONSE_TO_NUTRIENT	3.41e-37	7.39e-18	5.95e-08	0	0	0	0	2.8e-46	2.57e-34	9.88e-14	3.92e-08	2.46e-29	1.98e-14	1.62e-239	1.67e-220	5.8e-207
GO_RESPONSE_TO_ORGANIC_CYCLIC_COMPOUND	7.73e-20	0.999999	0.00335703	2.74e-307	3.71e-216	0	0	4.66e-34	7.27e-08	0.0456775	4.1e-08	5.03e-11	0.000902588	2.61e-216	7e-167	5.55e-165
GO_RESPONSE_TO_PURINE_CONTAINING_COMPOUND	0.00612573	1	5.39e-11	1.99e-212	8.19e-185	6.15e-273	0	1.69e-20	0.0527515	0.0196129	1.78e-24	8.37e-08	1.78e-12	1.02e-131	5.7e-96	3.38e-133
GO_RESPONSE_TO_RADIATION	0.989273	1	7.1e-19	1.66e-186	4.08e-269	5e-283	0	1.93e-07	0.008151	0.000136675	1.29e-31	0.0251871	7.25e-15	1.14e-125	2.04e-142	7.12e-153
GO_RESPONSE_TO_TOPOLOGICALLY_INCORRECT_PROTEIN	1	1.34e-23	1	6.01e-274	0	2.69e-98	0	0.348613	1.13e-37	8.75e-85	9.79e-39	1	0.999737	6.27e-82	3.19e-212	4.22e-107
GO_RESPONSE_TO_TOXIC_SUBSTANCE	1	0.997781	5.19e-20	5.98e-178	2.59e-290	8.4e-291	0	0.00038935	3.96e-06	2.24e-05	3.27e-25	0.00129043	2.55e-25	1.68e-160	3.05e-184	2.53e-204
GO_RESPONSE_TO_TRANSFORMING_GROWTH_FACTOR_BETA	0.930702	0.0273954	6.89e-12	3.99e-241	0	6.34e-264	0	4.54e-15	2.21e-21	4.27e-67	1.14e-76	3.3e-23	4.66e-40	4.48e-38	1.33e-67	4.62e-97
GO_RESPONSE_TO_TRANSITION_METAL_NANOPARTICLE	0.999997	0.0446813	1.37e-44	1.31e-208	0	0	0	0.17019	4.84e-06	4.48e-10	1.24e-37	1.53e-10	2e-51	6.74e-148	2.32e-184	3.67e-251
GO_RESPONSE_TO_UV	1	0.904968	1.83e-32	7.2e-119	0	1.29e-260	0	1	0.17587	4.25e-75	1.48e-118	0.70357	5.01e-36	4.85e-33	3.06e-144	1.12e-211
GO_RESPONSE_TO_WOUNDING	3.32e-20	1	0.998967	2.38e-285	2.61e-189	3.8e-281	0	1.32e-23	0.00606405	1.74e-05	2.46e-08	1.5e-16	0.0232076	1.73e-189	5.79e-130	5.92e-136
GO_RIBOSOME_BIOGENESIS	5.04e-13	0.996119	1	1.25e-294	5.31e-143	2.68e-212	0	2.41e-26	2.19e-08	0.0300108	0.349971	1.57e-15	0.0880568	2.9e-165	7.76e-143	1.8e-140
GO_RIBOSOME	5.95e-18	0.000495536	1	0	2.52e-139	1.1e-137	0	1.35e-23	4.46e-17	1.03e-19	0.511686	4.18e-14	1	1.13e-99	3.83e-110	1.34e-87
GO_RNA_CATABOLIC_PROCESS	1.34e-16	0.999999	1	0	1.96e-154	2.37e-198	0	1.88e-70	4.9e-37	1.7e-08	6.43e-09	2.83e-12	0.474988	1.07e-113	1.04e-90	8.41e-62
GO_RNA_POLYMERASE_II_TRANSCRIPTION_FACTOR_ACTIVITY_SEQUENCE_SPECIFIC_DNA_BINDING	2.54e-25	3.05e-12	0.986329	0	2.43e-257	1.15e-286	0	1.13e-33	1.13e-27	1.18e-12	0.0134164	5e-18	0.0588962	2.15e-148	2.21e-158	3.61e-100
GO_RNA_SPLICING	0.305941	4.51e-14	0.984424	0	0	6.85e-169	0	4.37e-24	1.81e-39	9.17e-41	1.58e-21	0.00763969	0.246576	4.37e-141	1.06e-155	1.71e-84
GO_RRNA_METABOLIC_PROCESS	6.17e-20	0.999969	0.999983	3.98e-308	4.68e-154	8.78e-265	0	8.5e-37	2.54e-08	0.000825035	0.000204715	3.39e-20	0.0011014	1.27e-170	2.59e-163	2.28e-140
GO_SECOND_MESSENGER_MEDIATED_SIGNALING	3.45e-05	1	3.16e-12	6e-215	5.09e-259	0	0	1.75e-15	0.0943798	3.5e-06	5.85e-32	2.67e-21	4.47e-28	1.37e-142	2.92e-111	2.25e-175
GO_SECONDARY_ACTIVE_TRANSMEMBRANE_TRANSPORTER_ACTIVITY	1.06e-32	1	0.155232	1.23e-281	3.51e-269	6.09e-286	0	6.22e-34	0.00115125	2.79e-18	4.03e-35	3.87e-11	0.443387	6.99e-87	1.43e-110	5.2e-118
GO_SEQUENCE_SPECIFIC_DNA_BINDING	9.12e-18	5.93e-12	0.851821	0	5.89e-271	3.82e-263	0	4.57e-23	3.32e-20	5.83e-18	1.82e-06	3.56e-07	0.754444	1.49e-135	9.83e-168	6.52e-107
GO_SEX_DIFFERENTIATION	1.9e-14	0.925701	2.28e-24	0	9.52e-305	0	0	7.88e-28	1.07e-12	0.00187638	1.39e-17	2.47e-10	4.68e-16	5.72e-151	9.2e-145	6.09e-138
GO_SIGNAL_RELEASE	0.00503809	7.46e-05	5.01e-12	3.21e-252	3.31e-298	1.88e-256	0	1.58e-19	1.12e-20	2.36e-23	1.07e-28	1.35e-12	6.43e-20	7.32e-83	2.42e-92	7.32e-92
GO_SIGNAL_TRANSDUCTION_BY_P53_CLASS_MEDIATOR	0.998261	4.65e-27	1.67e-16	0	0	1.7e-238	0	1.79e-19	9.95e-50	5.76e-66	7.62e-59	0.00308728	4.14e-15	4.27e-39	2.47e-111	3.07e-69
GO_SINGLE_ORGANISM_BEHAVIOR	2.9e-14	0.993571	0.999999	0	3.35e-162	8.33e-279	0	1.25e-34	2.05e-13	0.244523	0.65047	1.81e-14	0.0810467	8.73e-180	1.24e-173	1.18e-151
GO_SISTER_CHROMATID_SEGREGATION	1	1	3.98e-252	9.19e-102	0	0	0	1	0.628423	2.58e-47	1.69e-236	0.999977	2.13e-120	1.57e-67	3.72e-187	0
GO_SITE_OF_POLARIZED_GROWTH	1.88e-36	0.94062	0.262168	2.04e-306	3.08e-187	3.71e-299	0	1.21e-33	1.43e-08	0.000240378	0.000360915	5.03e-14	0.0152061	1.93e-158	7.25e-130	6.14e-86
GO_SKELETAL_MUSCLE_ORGAN_DEVELOPMENT	3.47e-52	0.000171893	1	0	3.49e-165	0	0	2.21e-46	6.97e-22	8.32e-06	0.920783	2.3e-59	3.62e-09	3.32e-152	2.52e-105	1.17e-64
GO_SKELETAL_SYSTEM_DEVELOPMENT	1.21e-32	0.324413	0.191898	0	3.57e-252	6.33e-307	0	4.5e-32	3.43e-09	4.68e-10	1.93e-10	2.28e-19	0.0001172	6.8e-170	6.35e-167	7.39e-139
GO_SKELETAL_SYSTEM_MORPHOGENESIS	4.48e-79	0.0437646	0.994841	0	1.87e-210	0	0	1.28e-96	1.56e-36	5.72e-06	0.034858	2.69e-30	0.0701269	1.8e-204	1.25e-157	1.54e-100
GO_SMALL_MOLECULE_BIOSYNTHETIC_PROCESS	1	2.87e-12	1.27e-29	2.17e-226	0	1.24e-192	0	0.000628164	2.31e-26	1.81e-25	2.98e-34	1	6.33e-09	5.36e-75	2.62e-130	6.63e-102
GO_SPINDLE	1	0.0135412	1.07e-36	1.33e-142	0	1.93e-269	0	1	0.00222735	1.81e-50	1.52e-80	0.999955	1.09e-25	2.22e-61	2.36e-212	3.29e-219
GO_STEM_CELL_DIFFERENTIATION	1.28e-12	1	7.16e-24	1.02e-242	6.4e-279	0	0	2.87e-27	1.76e-09	2.76e-07	1.54e-35	2.14e-10	3.65e-17	3.52e-141	6.96e-120	2.33e-123
GO_STRIATED_MUSCLE_CELL_DIFFERENTIATION	2.12e-66	0.821571	0.549981	5.98e-306	3.7e-198	0	0	1.37e-21	0.824736	0.00252892	0.00238773	4.51e-34	0.010381	8.75e-169	1.19e-120	1.85e-141
GO_SUPRAMOLECULAR_FIBER	0.173414	0.999649	2.03e-19	3.79e-210	4.67e-282	0	0	6.61e-05	0.0416868	0.000140408	2.1e-23	9.4e-17	7.92e-35	9.05e-158	1.09e-143	2.84e-194
GO_SYMPORTER_ACTIVITY	1.76e-75	0.96547	0.991994	0	8.47e-246	0	0	1.38e-71	1.46e-16	8.86e-20	1.86e-20	1.31e-35	0.0409973	2.82e-95	1.01e-83	3.64e-50
GO_SYNAPSE_PART	1.63e-20	1	1	1.8e-305	1.7e-124	5.06e-234	0	2.31e-41	3.31e-12	0.436908	0.852522	6.87e-18	0.41458	1.24e-177	9.67e-108	1.18e-111
GO_SYNAPTIC_MEMBRANE	3.25e-22	1	1	5.14e-308	6.54e-67	1.05e-237	0	3.62e-52	1.11e-09	0.998329	0.99907	9.25e-34	0.22474	7.08e-184	1.23e-93	1.77e-123
GO_SYNAPTIC_SIGNALING	1.76e-27	1	1	1.51e-275	2.83e-70	1.79e-273	0	7.68e-50	5.93e-06	1	0.999874	2.85e-31	0.0148409	5.13e-178	3.46e-105	1.62e-118
GO_T_CELL_DIFFERENTIATION	6.53e-41	0.00310265	1	0	1.08e-151	4.82e-255	0	2.06e-93	2.7e-54	7.77e-06	0.997046	2.94e-39	0.183393	8.56e-173	3.26e-126	2.88e-44
GO_TELENCEPHALON_DEVELOPMENT	0.999882	5.22e-11	4.34e-27	3.33e-255	0	6.09e-274	0	7.48e-07	1.81e-20	3.06e-37	1.33e-49	0.938688	6.84e-11	4.1e-78	1.84e-174	7.68e-118
GO_TRANSCRIPTION_COACTIVATOR_ACTIVITY	4.17e-31	2.32e-26	1	0	6.13e-269	1.18e-177	0	1.57e-75	1.73e-74	4.74e-37	4.14e-06	5.13e-06	1	9.13e-101	2.36e-141	1.63e-18
GO_TRANSCRIPTION_COREPRESSOR_ACTIVITY	0.279091	1.52e-25	1	0	0	2.12e-185	0	6.03e-06	2.06e-22	4.88e-36	4.35e-07	0.000217619	0.46478	8.99e-109	7.05e-144	1.36e-100
GO_TRANSCRIPTION_FACTOR_ACTIVITY_PROTEIN_BINDING	0.0001341	9.45e-17	1	0	1.8e-261	1.2e-158	0	3.06e-27	4.64e-38	7.85e-29	0.000152072	0.0342712	0.999957	8.86e-105	2.73e-155	8.17e-72
GO_TRANSCRIPTION_FACTOR_ACTIVITY_RNA_POLYMERASE_II_CORE_PROMOTER_PROXIMAL_REGION_SEQUENCE_SPECIFIC_BINDING	3.55e-48	4.16e-07	0.792185	0	5.7e-217	0	0	5.68e-32	8.21e-12	0.00182828	0.382847	8.33e-46	4.37e-09	4.21e-163	1.07e-143	1.79e-110
GO_TRANSCRIPTION_FACTOR_BINDING	0.368271	3.66e-16	0.168439	7.55e-302	0	5.64e-196	0	9.1e-11	7.53e-26	9.39e-31	1.56e-15	0.665549	0.639494	3.37e-100	2.68e-146	1.76e-112
GO_TRANSCRIPTION_FACTOR_COMPLEX	1.19e-14	5.36e-30	1	0	3.12e-278	4.99e-201	0	6.38e-37	2.11e-49	8.75e-44	1.08e-10	4.62e-07	0.979009	2.05e-70	5.98e-136	1.05e-69
GO_TRANSCRIPTION_FROM_RNA_POLYMERASE_II_PROMOTER	2.83e-29	2.85e-12	0.929672	0	7.27e-276	6.6e-254	0	2.63e-32	2.41e-23	2.37e-20	1.15e-07	3.98e-06	0.999311	2.01e-110	5.02e-172	1.83e-97
GO_TRANSCRIPTIONAL_ACTIVATOR_ACTIVITY_RNA_POLYMERASE_II_CORE_PROMOTER_PROXIMAL_REGION_SEQUENCE_SPECIFIC_BINDING	2.09e-55	3.83e-09	0.432429	0	3.74e-220	0	0	2.16e-31	2.13e-12	2.6e-05	0.0680879	3.08e-23	0.302266	6.92e-124	2.48e-146	6.31e-104
GO_TRANSCRIPTIONAL_ACTIVATOR_ACTIVITY_RNA_POLYMERASE_II_TRANSCRIPTION_REGULATORY_REGION_SEQUENCE_SPECIFIC_BINDING	2.73e-57	5.75e-10	0.999996	0	3.84e-212	5.28e-301	0	1.42e-35	6.71e-16	7.74e-09	0.201695	6.17e-29	0.772146	1.22e-110	2.66e-129	7.45e-85
GO_TRANSCRIPTIONAL_REPRESSOR_ACTIVITY_RNA_POLYMERASE_II_TRANSCRIPTION_REGULATORY_REGION_SEQUENCE_SPECIFIC_BINDING	3.05e-39	2.8e-11	0.967351	0	4.88e-242	0	0	6.08e-27	7.4e-17	1.41e-05	0.77014	4.35e-73	3.95e-30	2e-174	7.93e-82	9.55e-108
GO_TRANSFERASE_COMPLEX_TRANSFERRING_PHOSPHORUS_CONTAINING_GROUPS	1	2.39e-21	0.00705021	1.73e-271	0	4.19e-129	0	5.9e-07	6.82e-37	3.91e-30	7.12e-20	0.999999	0.702178	6.98e-162	1.52e-212	4.09e-104
GO_TRANSFERASE_COMPLEX	0.769592	1.56e-11	0.987068	8.23e-290	6.28e-299	1.24e-149	0	1.01e-12	7.11e-25	6.32e-26	3e-11	0.967619	0.993729	3e-146	2.84e-195	6.4e-106
GO_TRANSMEMBRANE_RECEPTOR_PROTEIN_SERINE_THREONINE_KINASE_SIGNALING_PATHWAY	6.76e-28	0.983873	0.203698	0	3.01e-229	2.45e-289	0	1.39e-36	8.23e-11	1.7e-20	6.16e-22	2.64e-46	2.72e-20	8.04e-88	4.9e-52	2.51e-71
GO_TRANSPORTER_COMPLEX	1.25e-37	1	0.999947	3.39e-269	1.44e-89	0	0	2.95e-53	0.646285	1	0.344292	4.17e-46	6.07e-08	5.19e-256	3.92e-189	5.21e-213
GO_TUBE_DEVELOPMENT	0.00133879	0.406428	4.5e-20	8.54e-267	0	1.09e-293	0	9.05e-12	4.2e-08	4.76e-14	2.06e-31	0.000838953	5.61e-11	9.78e-121	1.58e-162	6.82e-151
GO_TUBE_FORMATION	1.4e-34	0.0111559	2.54e-98	1e-274	0	0	0	1.87e-27	2.56e-06	3.05e-118	2.11e-211	2.83e-15	1.16e-31	0.000730642	8.45e-54	1.02e-88
GO_TUBULIN_BINDING	1	0.786813	4.37e-47	4.15e-216	0	0	0	0.000161168	3.32e-09	5.65e-07	1.41e-33	0.0310767	2.48e-38	2.66e-100	6.19e-164	1.97e-173
GO_UBIQUITIN_LIKE_PROTEIN_LIGASE_BINDING	0.999966	2.03e-16	0.432333	0	0	5.95e-168	0	4.11e-12	7.64e-36	6.67e-32	5.78e-20	0.792148	0.120023	5.46e-197	8.28e-279	1.6e-187
GO_UBIQUITIN_LIKE_PROTEIN_TRANSFERASE_ACTIVITY	0.978769	3.47e-26	1	7.67e-284	0	2.19e-132	0	0.00261494	2.17e-18	1.3e-107	2.48e-61	0.946057	0.998325	6.5e-28	2.93e-164	2.73e-105
GO_UROGENITAL_SYSTEM_DEVELOPMENT	8.83e-20	1.09e-05	9.39e-20	0	0	0	0	3.7e-16	1.63e-08	2.17e-12	4.62e-21	2.29e-25	6.25e-25	2.71e-159	3.4e-139	1.01e-181
GO_VACUOLE_ORGANIZATION	0.999733	1.42e-22	1	0	4.91e-217	8.38e-108	0	1.4e-14	8.76e-43	7.31e-19	0.782199	0.705385	1	3.17e-126	2.72e-170	6.93e-82
GO_VIRAL_LIFE_CYCLE	0.999932	2.27e-18	1	3.73e-261	4.98e-250	1.05e-125	0	2.31e-08	1.19e-30	1.12e-28	3.52e-06	0.849756	0.991573	5.06e-118	3.45e-187	4.57e-112
GO_VOLTAGE_GATED_CATION_CHANNEL_ACTIVITY	9.66e-73	1	2.48e-18	6.87e-243	2.02e-174	0	0	3.04e-70	0.992831	1	3.44e-22	7.46e-62	1.17e-27	1.02e-259	4.06e-113	6.27e-188
GO_VOLTAGE_GATED_ION_CHANNEL_ACTIVITY	5.29e-32	1	1e-23	7.3e-211	1.26e-170	0	0	3.57e-51	0.291778	1	9.1e-17	2.53e-46	8.19e-36	5.44e-199	4.64e-74	5.93e-141
GO_WNT_SIGNALING_PATHWAY	1.37e-11	3.34e-11	8.36e-11	0	0	9.08e-244	0	1e-25	4.59e-25	1.46e-14	8.14e-18	0.0278629	0.011766	8.65e-144	4.7e-167	1.69e-122
GO_WOUND_HEALING	1.65e-26	1	0.999989	1.25e-293	5.6e-176	9.28e-284	0	2.11e-29	0.00111267	0.000223934	1.8e-06	5.68e-22	0.0268931	4.43e-190	1.74e-117	5.88e-128
HALLMARK_ADIPOGENESIS	0.0144732	1.28e-22	1	0	6.18e-243	6.43e-97	0	7.06e-53	4.7e-77	2.41e-34	0.00328091	0.989854	1	3.57e-78	1.14e-144	1.67e-25
HALLMARK_ANDROGEN_RESPONSE	1.56e-14	2.5e-05	1.44e-06	0	3.68e-242	8.75e-242	0	9.7e-79	1.33e-78	3.28e-14	4.58e-08	5.98e-15	1.68e-09	2.71e-98	3.06e-84	1.51e-18
HALLMARK_ANGIOGENESIS	0.208773	5.71e-11	1	0	7.48e-122	1.44e-84	0	4.33e-62	6.26e-118	4.35e-11	1	1.51e-08	0.954215	6.65e-150	1.42e-112	2.83e-29
HALLMARK_APICAL_SURFACE	0.000167517	1	1.61e-28	2.73e-157	8.21e-263	1.33e-292	0	1.09e-08	0.757483	4.64e-10	7.26e-49	1.49e-05	2.65e-15	3.91e-61	8.95e-83	8.94e-118
HALLMARK_BILE_ACID_METABOLISM	2.88e-22	1	2.43e-28	6.54e-195	1.08e-215	0	0	3.06e-17	0.999926	0.855218	1.41e-26	4.35e-23	1.11e-26	3.03e-158	1.37e-71	6.01e-158
HALLMARK_CHOLESTEROL_HOMEOSTASIS	1	3.12e-18	2.28e-26	0	0	3.06e-193	0	1.74e-70	4.2e-122	5.79e-32	8.08e-33	1	1.26e-09	5.64e-62	2.32e-143	3.46e-20
HALLMARK_COAGULATION	5.46e-11	1.76e-18	1	0	2.77e-213	5.45e-190	0	5.77e-81	3.64e-80	2e-18	0.360287	0.00391058	1	7.84e-206	1.9e-263	2.59e-130
HALLMARK_COMPLEMENT	0.742299	3.68e-22	1	0	1.69e-209	3.03e-103	0	1.39e-27	2.72e-48	6.47e-16	0.979245	0.970973	1	2.48e-118	1.35e-155	2.52e-65
HALLMARK_DNA_REPAIR	1	0.66991	2.66e-21	1.58e-190	0	1.66e-224	0	0.00322555	1.77e-13	1.62e-47	4.44e-88	0.954884	1.17e-13	1.28e-102	7.32e-194	5.24e-156
HALLMARK_E2F_TARGETS	1	1	0	8.65e-53	0	0	0	1	1	6.47e-78	0	0.999983	4.35e-233	2.15e-43	4.66e-214	0
HALLMARK_EPITHELIAL_MESENCHYMAL_TRANSITION	2.44e-39	1	1.19e-06	0	2.01e-152	0	0	3.15e-71	2.05e-16	0.997248	2.45e-05	6.18e-71	1.22e-47	5e-207	1.3e-60	2.94e-118
HALLMARK_ESTROGEN_RESPONSE_EARLY	0.263031	1	5.67e-301	1.51e-136	0	0	0	0.855271	0.999544	2.4e-20	1.94e-189	2.87e-08	1.88e-132	2.42e-48	4.08e-79	9.81e-263
HALLMARK_ESTROGEN_RESPONSE_LATE	0.999999	1	0	2.82e-119	0	0	0	0.744666	0.870895	4.15e-05	5.67e-203	0.999684	4.86e-135	1.36e-59	6.9e-85	6.11e-265
HALLMARK_FATTY_ACID_METABOLISM	1	0.0113526	3.88e-51	3.97e-210	0	2.43e-215	0	5.01e-07	1.49e-29	3.43e-54	2.85e-105	1	4.55e-15	6.15e-14	5.52e-121	2.4e-101
HALLMARK_G2M_CHECKPOINT	1	1	0	1.35e-56	0	0	0	1	1	6.07e-17	0	0.000380319	6.52e-305	8.11e-54	2.73e-87	0
HALLMARK_GLYCOLYSIS	0.358444	1	3.07e-21	2.86e-219	1.64e-273	8.34e-283	0	1.7e-13	6.39e-05	6.87e-07	7.51e-36	2.04e-07	6.68e-21	1.05e-92	2.23e-87	1.87e-120
HALLMARK_HEDGEHOG_SIGNALING	0.991898	1	4.13e-21	5.34e-154	5.63e-294	8.79e-258	0	0.128423	0.840666	1.36e-43	4.08e-82	0.587801	8.47e-13	8.19e-49	4.59e-110	1.39e-150
HALLMARK_HYPOXIA	0.00686802	0.19406	3.25e-14	7.48e-290	3.77e-271	0	0	9.37e-12	1.98e-10	1.97e-08	2.89e-17	1.06e-10	3.62e-22	3.21e-134	2.5e-138	1.51e-181
HALLMARK_IL6_JAK_STAT3_SIGNALING	5.79e-54	0.309358	0.999982	0	4.85e-169	4.1e-218	0	4.83e-65	2.56e-20	2.47e-23	1.43e-14	1.11e-21	0.918674	1.83e-83	5.7e-102	1.38e-97
HALLMARK_MITOTIC_SPINDLE	0.713476	0.413511	6.17e-26	3.3e-248	0	0	0	9.05e-07	1.14e-07	2.35e-15	3.25e-35	0.000130643	1.54e-20	3.31e-111	4.46e-132	2.16e-166
HALLMARK_MTORC1_SIGNALING	0.0702222	0.843398	3.87e-57	7.77e-243	0	0	0	7.46e-12	3.37e-09	4.09e-23	2.22e-65	6.75e-14	5.07e-55	3.81e-73	2.91e-123	1.34e-164
HALLMARK_MYC_TARGETS_V1	1	1	7.08e-104	2.89e-77	0	0	0	0.898474	1	4.3e-17	1.29e-133	0.000297191	9.39e-77	2.68e-109	2.14e-147	4.46e-265
HALLMARK_MYC_TARGETS_V2	1	3.54e-06	3.6e-134	8.02e-154	0	0	0	1	0.164968	1.31e-06	3.9e-47	0.997219	1.29e-57	7.64e-44	2.83e-89	1.32e-115
HALLMARK_NOTCH_SIGNALING	1.85e-23	3.74e-82	5.75e-123	0	0	5e-304	0	3.53e-23	7.96e-33	1.01e-171	1.79e-251	0.000109466	4.77e-44	0.0562497	1.91e-77	5.06e-113
HALLMARK_OXIDATIVE_PHOSPHORYLATION	1	4.72e-35	1	4.86e-278	4.93e-279	8.29e-73	0	0.00012379	5.57e-38	1.02e-40	0.00199622	1	0.999996	7.56e-98	3.17e-162	1.52e-90
HALLMARK_PANCREAS_BETA_CELLS	2.61e-134	0.738086	1	0	9.7e-66	1.15e-242	0	1.45e-205	1.26e-49	6.16e-08	1	5.38e-87	1	1.86e-172	1.18e-63	0.0470924
HALLMARK_PEROXISOME	1.78e-08	1	7.5e-94	1.97e-148	4.97e-305	0	0	7.2e-08	1	1.6e-10	7.64e-108	4.77e-10	3.46e-44	1.75e-39	5.81e-52	2.45e-177
HALLMARK_REACTIVE_OXIGEN_SPECIES_PATHWAY	8.17e-11	1	5.16e-06	0	7.37e-296	0	0	1.78e-32	2.71e-06	1.34e-05	3.32e-36	1.81e-119	2.83e-88	3.8e-233	7.68e-57	1.63e-199
HALLMARK_SPERMATOGENESIS	0.00826292	1	1.75e-25	2.05e-188	0	0	0	1.41e-08	0.773115	3.55e-10	1.22e-57	2.26e-28	1.66e-48	7.06e-162	3.56e-97	5.76e-257
HALLMARK_TGF_BETA_SIGNALING	0.00377944	1.05e-78	0.999999	0	0	9.72e-160	0	6.87e-96	6.95e-179	2.77e-40	0.0019363	7.91e-17	0.00766055	1.13e-145	2.21e-141	1.01e-58
HALLMARK_UNFOLDED_PROTEIN_RESPONSE	0.860764	1.74e-38	4.6e-07	0	0	1.2e-188	0	3.58e-10	2.16e-38	3.18e-115	5.53e-90	1	0.954115	1.33e-35	3.92e-200	5.05e-109
Feature	Code
CNV	1
MET	2
MRNA	3
Null	0
